# Supplementary material for: Molecularly engineered AIEgens with enhanced quantum and singlet-oxygen yield for mitochondria-targeted imaging and photodynamic therapy
Source: Royal Society of Chemistry journal article supplement (doi:10.1039/d2sc00889k), 2022-01-01
Supplement: d2sc00889k1.pdf [file d2sc00889k1.pdf]

## Supporting Information

# Molecularly Engineered AIEgens with Enhanced Quantum and Singlet-Oxygen Yield for Mitochondrion-Targeted Cell Imaging and Photodynamic Therapy

Fang-Zhou Xu,<sup>‡a</sup> Ling Zhu,<sup>‡a</sup> Hai-Hao Han,<sup>‡a</sup> Jian-Wei Zou,<sup>\*b</sup> Yi Zang,<sup>c,d</sup> Jia Li,<sup>\*c,d</sup> Tony D. James,<sup>\*e,f</sup> Xiao-Peng He,<sup>\*a</sup> and Cheng-Yun Wang<sup>\*a</sup>

<sup>a</sup> Key Laboratory for Advanced Materials and Joint International Research Laboratory of Precision Chemistry and Molecular Engineering, Feringa Nobel Prize Scientist Joint Research Center, Frontiers Center for Materiobiology and Dynamic Chemistry, School of Chemistry and Molecular Engineering, East China University of Science and Technology, 130 Meilong Rd., Shanghai 200237, China. E-mail: [xphe@ecust.edu.cn](mailto:xphe@ecust.edu.cn); [cywang@ecust.edu.cn](mailto:cywang@ecust.edu.cn)

<sup>b</sup> NingboTech University, Ningbo 315100, Zhejiang, PR China. E-mail: [jwzou@nit.net.cn](mailto:jwzou@nit.net.cn)

<sup>c</sup> National Center for Drug Screening, State Key Laboratory of Drug Research, Shanghai Institute of Materia Medica, Chinese Academy of Sciences, Shanghai 201203, China. E-mail: [jli@simm.ac.cn](mailto:jli@simm.ac.cn)

<sup>d</sup> University of Chinese Academy of Sciences, No. 19A Yuquan Road, Beijing 100049, P. R. China

<sup>e</sup> Department of Chemistry, University of Bath, Bath BA2 7AY, UK. E-mail: [t.d.james@bath.ac.uk](mailto:t.d.james@bath.ac.uk)

<sup>f</sup> School of Chemistry and Chemical Engineering, Henan Normal University, Xinxiang 453007, China

<sup>‡</sup> Equal contribution

## Table of Contents

|                                                                                                                                                                                                     |     |
|-----------------------------------------------------------------------------------------------------------------------------------------------------------------------------------------------------|-----|
| <b>Scheme S1</b> Synthetic routes of <b>LOCK-0</b> , <b>LOCK-1</b> , and <b>LOCK-2</b> .....                                                                                                        | S10 |
| <b>Fig. S1</b> UV-visible absorption spectra of <b>LOCK-0</b> , <b>LOCK-1</b> and <b>LOCK-2</b> in aqueous solution.....                                                                            | S10 |
| <b>Fig. S2</b> PL spectra of <b>LOCK-0</b> , <b>LOCK-1</b> and <b>LOCK-2</b> in THF/H <sub>2</sub> O solution.....                                                                                  | S10 |
| <b>Fig. S3</b> Solvent effect experiments of <b>LOCK-0</b> , <b>LOCK-1</b> and <b>LOCK-2</b> .....                                                                                                  | S11 |
| <b>Fig. S4</b> Dihedral angles ( $\theta$ ) of <b>LOCK-0</b> , <b>LOCK-1</b> and <b>LOCK-2</b> at ground state ( $S_0$ ) and $S_1$ excited state.....                                               | S11 |
| <b>Fig. S5</b> ROS detection by H <sub>2</sub> DCF for <b>LOCK-0</b> , <b>LOCK-1</b> and <b>LOCK-2</b> .....                                                                                        | S12 |
| <b>Fig. S6</b> Measurement and calculation of <sup>1</sup> O <sub>2</sub> yields of <b>LOCK-0</b> , <b>LOCK-1</b> and <b>LOCK-2</b> under white light irradiation.....                              | S12 |
| <b>Fig. S7</b> Measurement and calculation of <sup>1</sup> O <sub>2</sub> yields of <b>LOCK-0</b> , <b>LOCK-1</b> and <b>LOCK-2</b> under 480 or 520 nm laser irradiation.....                      | S13 |
| <b>Fig. S8</b> Concentration-dependent fluorescence imaging by confocal laser-scanning of HepG2 cells with <b>LOCK-0</b> , <b>LOCK-1</b> and <b>LOCK-2</b> in washed and wash-free manner.....      | S13 |
| <b>Fig. S9</b> Successive fluorescence imaging by confocal laser-scanning of HepG2 cells with <b>LOCK-0</b> , <b>LOCK-1</b> and <b>LOCK-2</b> .....                                                 | S14 |
| <b>Fig. S10</b> Fluorescence quantification of HepG2 cells with <b>LOCK-0</b> , <b>LOCK-1</b> and <b>LOCK-2</b> in the photostability experiments.....                                              | S14 |
| <b>Fig. S11</b> Fluorescence imaging of HepG2 cells with <b>LOCK-0</b> , <b>LOCK-1</b> and <b>LOCK-2</b> co-stained with LTG by confocal laser-scanning microscopy.....                             | S15 |
| <b>Fig. S12</b> Fluorescence imaging of HepG2 cells with <b>LOCK-2</b> stained with PI, Annexin V-FITC with white light irradiation by confocal laser-scanning microscopy.....                      | S16 |
| <b>Fig. S13</b> Fluorescence imaging of HepG2 cells with <b>LOCK-2</b> stained with PI, Annexin V-FITC without white light irradiation by confocal laser-scanning microscopy.....                   | S16 |
| <b>Fig. S14</b> Cell viability of HepG2 cells after treatment of various concentrations of <b>LOCK-0</b> , <b>LOCK-1</b> and <b>LOCK-2</b> in dark for 24 h.....                                    | S17 |
| <b>Fig. S15</b> Cell viability of HepG2 cells after treatment of various concentrations of <b>LOCK-0</b> , <b>LOCK-1</b> , <b>LOCK-2</b> , Ce6 and RB with and without white light irradiation..... | S17 |
| <b>Fig. S16</b> <sup>1</sup> H NMR spectrum of <b>compound 2</b> in CD <sub>3</sub> OD.....                                                                                                         | S18 |
| <b>Fig. S17</b> <sup>13</sup> C NMR spectrum of <b>compound 2</b> in CD <sub>3</sub> OD.....                                                                                                        | S18 |
| <b>Fig. S18</b> HRMS spectrum of <b>compound 2</b> .....                                                                                                                                            | S19 |
| <b>Fig. S19</b> <sup>1</sup> H NMR spectrum of <b>compound 4</b> in DMSO- <i>d</i> <sub>6</sub> .....                                                                                               | S19 |
| <b>Fig. S20</b> <sup>13</sup> C NMR spectrum of <b>compound 4</b> in DMSO- <i>d</i> <sub>6</sub> .....                                                                                              | S20 |
| <b>Fig. S21</b> HRMS spectrum of <b>compound 4</b> .....                                                                                                                                            | S20 |

|                                                                                                                      |     |
|----------------------------------------------------------------------------------------------------------------------|-----|
| <b>Fig. S22</b> $^1\text{H}$ NMR spectrum of <b>compound 5</b> in $\text{DMSO-}d_6$ .                                | S21 |
| <b>Fig. S23</b> $^{13}\text{C}$ NMR spectrum of <b>compound 5</b> in $\text{DMSO-}d_6$ .                             | S21 |
| <b>Fig. S24</b> HRMS spectrum of <b>compound 5</b> .                                                                 | S22 |
| <b>Fig. S25</b> $^1\text{H}$ NMR spectrum of <b>compound 6</b> in $\text{DMSO-}d_6$ .                                | S22 |
| <b>Fig. S26</b> $^{13}\text{C}$ NMR spectrum of <b>compound 6</b> in $\text{DMSO-}d_6$ .                             | S23 |
| <b>Fig. S27</b> HRMS spectrum of <b>compound 6</b> .                                                                 | S23 |
| <b>Fig. S28</b> $^1\text{H}$ NMR spectrum of <b>compound 7</b> in $\text{DMSO-}d_6$ .                                | S24 |
| <b>Fig. S29</b> $^{13}\text{C}$ NMR spectrum of <b>compound 7</b> in $\text{DMSO-}d_6$ .                             | S24 |
| <b>Fig. S30</b> HRMS spectrum of <b>compound 7</b> .                                                                 | S25 |
| <b>Fig. S31</b> $^1\text{H}$ NMR spectrum of <b>LOCK-0</b> in $\text{DMSO-}d_6$ .                                    | S25 |
| <b>Fig. S32</b> $^{13}\text{C}$ NMR spectrum of <b>LOCK-0</b> in $\text{DMSO-}d_6$ .                                 | S26 |
| <b>Fig. S33</b> HRMS spectrum of <b>LOCK-0</b> .                                                                     | S26 |
| <b>Fig. S34</b> $^1\text{H}$ NMR spectrum of <b>LOCK-1</b> in $\text{DMSO-}d_6$ .                                    | S27 |
| <b>Fig. S35</b> $^{13}\text{C}$ NMR spectrum of <b>LOCK-1</b> in $\text{DMSO-}d_6$ .                                 | S27 |
| <b>Fig. S36</b> HRMS spectrum of <b>LOCK-1</b> .                                                                     | S28 |
| <b>Fig. S37</b> $^1\text{H}$ NMR spectrum of <b>LOCK-2</b> in $\text{DMSO-}d_6$ .                                    | S28 |
| <b>Fig. S38</b> $^{13}\text{C}$ NMR spectrum of <b>LOCK-2</b> in $\text{DMSO-}d_6$ .                                 | S29 |
| <b>Fig. S39</b> HRMS spectrum of <b>LOCK-2</b> .                                                                     | S29 |
| <b>Table S1</b> Energy levels and energy gaps of HOMO and LUMO for <b>LOCK-0</b> , <b>LOCK-1</b> and <b>LOCK-2</b> . | S30 |
| <b>Table S2</b> Electronic excitation energy levels of singlet and triplet states for <b>LOCK-0</b> .                | S30 |
| <b>Table S3</b> Electronic excitation energy levels of singlet and triplet states for <b>LOCK-1</b> .                | S30 |
| <b>Table S4</b> Electronic excitation energy levels of singlet and triplet states for <b>LOCK-2</b> .                | S31 |

## Materials and methods

All chemicals are commercially available without further purification. The NMR spectra were recorded with a Bruker AM 400 spectrometer or an Ascend 600 spectrometer. High resolution mass spectra were recorded with a Waters LCT Premier XE spectrometer. UV-vis spectra were recorded with an Agilent Cary 60 spectrophotometer. Fluorescence spectra were recorded with an Agilent Cary Eclipse fluorescence spectrophotometer. Absolute QY was measured by an Edinburgh FLS980 fluorescence spectrophotometer with a standard integrating sphere. EPR spectra were recorded with a Bruker EMX-8/2.7 electro-spin resonance spectrometer. Confocal cell images in the colocalization experiments were recorded with a Leica TCS SP8 laser scanning confocal microscopy. Other confocal cell images were recorded with Opera Phenix high content imaging system and quantified by the Columbus image data analysis system (Perkinelmer, US). Absorbance of the solutions in MTS assay was measured by a M5 microplate reader (Molecular Device, USA).

## Synthesis of LOCK-0, LOCK-1, and LOCK-2

**Compounds 1 and 3** were prepared according to previous literature reports.<sup>1,2</sup>

**Compound 2.** A solution of **compound 1** (1.91 g, 4.0 mmol) and 4-methyl-quinoline (0.57 g, 4.0 mmol) in acetonitrile (30 mL) was refluxed under nitrogen for 48 h. After cooling to room temperature, the solvent was removed by evaporation under reduced pressure and then dissolved in minimal amount of methanol. The methanol solution was dropped into ether (80 mL) to yield a pale pink precipitate. After decantation, the precipitate was carefully washed with ethyl acetate (30 mL × 3) to afford a white solid (2.24 g, 90% of yield). <sup>1</sup>H NMR (400 MHz, CD<sub>3</sub>OD, ppm): δ 9.30 (d, *J* = 6.1 Hz, 1 H), 8.58–8.55 (m, 2 H), 8.27–8.23 (m, 1 H), 8.05 (t, *J* = 7.2 Hz, 1 H), 7.94 (d, *J* = 6.1 Hz, 1 H), 7.92–7.83 (m, 7 H), 7.81 (d, *J* = 1.4 Hz, 2 H), 7.76 (td, *J* = 7.8, 3.6 Hz, 6 H), 5.09 (t, *J* = 7.6 Hz, 2 H), 3.60 (td, *J* = 15.0, 2.8 Hz, 2 H), 3.05 (s, 3 H), 2.38–2.31 (m, 2 H), 1.96–1.86 (m, 2 H); <sup>13</sup>C NMR (101 MHz, CD<sub>3</sub>OD, ppm): δ 161.05, 149.23, 138.73, 136.41, 135.00, 131.73, 131.59, 130.98, 128.43, 128.27, 124.01, 123.88, 120.55, 120.39, 120.12, 119.26, 57.78, 31.86, 31.69, 22.77, 22.25, 20.87, 20.47. Mass spectrometry (ESI-MS, *m/z*): [M-2Br]<sup>2+</sup> calcd. for C<sub>32</sub>H<sub>32</sub>NP<sup>2+</sup>, 230.6134; found, 230.6077.

**Compound 4.** A solution of diphenylamine (784 mg, 4.7 mmol), 5-bromo-benzothiophene (1.00 g, 4.7 mmol), <sup>t</sup>BuONa (496 mg, 5.17 mmol), Pd<sub>2</sub>(dba)<sub>3</sub> (215 mg, 0.24 mmol) in toluene (50 mL) was refluxed under nitrogen overnight. After cooling to room temperature, the solution

was washed with water (20 mL × 3) and the solvent was evaporated under reduced pressure. The residue was purified with a silica gel column using a PE and DCM mixture (10:1 v/v) as the eluting solvent to afford a white powder (1.27 g, 90% of yield). <sup>1</sup>H NMR (400 MHz, DMSO-*d*<sub>6</sub>, ppm): δ 7.92 (d, *J* = 8.7 Hz, 1 H), 7.75 (d, *J* = 5.4 Hz, 1 H), 7.52 (d, *J* = 2.1 Hz, 1 H), 7.35 (d, *J* = 5.4 Hz, 1 H), 7.28 (t, *J* = 7.9 Hz, 4 H), 7.08 (dd, *J* = 8.6, 2.1 Hz, 1 H), 7.03–6.99 (m, 6 H); <sup>13</sup>C NMR (101 MHz, DMSO-*d*<sub>6</sub>, ppm): δ 147.60, 144.26, 140.81, 134.31, 129.45, 128.46, 123.92, 123.56, 123.24, 123.15, 122.48, 119.20. Mass spectrometry (ESI-MS, *m/z*): [M+H]<sup>+</sup> calcd. for C<sub>20</sub>H<sub>16</sub>NS<sup>+</sup>, 302.1003; found, 302.1000.

**Compound 5.** DMF (364 mg, 4.98 mmol) in a flask was placed in an ice water bath. POCl<sub>3</sub> (762 mg, 4.98 mmol) was added dropwise into the DMF with stirring during 30 min. Then a DCE (5 mL) solution of **compound 4** (500 mg, 1.66 mmol) was added dropwise into the mixture and the solution was heated to 80 °C and stirred for 4 h. After cooling to room temperature, the solvent was evaporated under reduced pressure. Water (100 mL) was poured into the residue and a white powder (508 mg, 93% of yield) was obtained through filtering. <sup>1</sup>H NMR (400 MHz, DMSO-*d*<sub>6</sub>, ppm): δ 9.77 (s, 1 H), 8.06 (d, *J* = 8.6 Hz, 1 H), 7.82 (d, *J* = 5.4 Hz, 1 H), 7.74 (d, *J* = 2.1 Hz, 1 H), 7.72 (d, *J* = 8.8 Hz, 2 H), 7.45–7.40 (m, 3 H), 7.26–7.20 (m, 4 H), 6.90 (d, *J* = 8.7 Hz, 2 H); <sup>13</sup>C NMR (101 MHz, DMSO-*d*<sub>6</sub>, ppm): δ 190.56, 153.04, 145.73, 142.36, 140.94, 136.45, 131.30, 129.95, 129.03, 128.37, 126.11, 121.62, 117.80. Mass spectrometry (ESI-MS, *m/z*): [M+H]<sup>+</sup> calcd. for C<sub>21</sub>H<sub>16</sub>NOS<sup>+</sup>, 330.0953; found, 330.0956.

**Compound 6.** The synthesis of **compound 6** is similar to that of **compound 4**. <sup>1</sup>H NMR (400 MHz, DMSO-*d*<sub>6</sub>, ppm): δ 8.30 (d, *J* = 8.5 Hz, 1 H), 8.27 (d, *J* = 7.7 Hz, 2 H), 8.16 (d, *J* = 1.9 Hz, 1 H), 7.96 (d, *J* = 5.4 Hz, 1 H), 7.60–7.57 (m, 2 H), 7.46–7.39 (m, 4 H), 7.30 (td, *J* = 7.0, 1.2 Hz, 2 H); <sup>13</sup>C NMR (101 MHz, DMSO-*d*<sub>6</sub>, ppm): δ 140.77, 140.50, 138.26, 133.44, 129.52, 126.22, 124.16, 123.07, 122.62, 121.78, 120.51, 119.96, 109.61. Mass spectrometry (ESI-MS, *m/z*): [M+H]<sup>+</sup> calcd. for C<sub>20</sub>H<sub>14</sub>NS<sup>+</sup>, 300.0847; found, 300.0848.

**Compound 7.** The synthesis of **compound 7** is similar to that of **compound 5**. <sup>1</sup>H NMR (400 MHz, DMSO-*d*<sub>6</sub>, ppm): δ 10.11 (s, 1 H), 8.90 (d, *J* = 1.1 Hz, 1 H), 8.42 (d, *J* = 7.7 Hz, 1 H), 8.34 (d, *J* = 8.5 Hz, 1 H), 8.20 (d, *J* = 1.9 Hz, 1 H), 8.00–7.97 (m, 2 H), 7.62 (d, *J* = 2.3 Hz, 1 H), 7.60 (d, *J* = 2.1 Hz, 1 H), 7.54–7.50 (m, 2 H), 7.43–7.39 (m, 2 H); <sup>13</sup>C NMR (101 MHz, DMSO-*d*<sub>6</sub>, ppm): δ 191.94, 143.98, 141.53, 140.76, 138.95, 132.56, 129.81, 129.30, 127.26, 124.16, 123.04, 122.83, 122.60, 121.16, 110.23. Mass spectrometry (ESI-MS, *m/z*): [M+H]<sup>+</sup> calcd. for C<sub>21</sub>H<sub>14</sub>NOS<sup>+</sup>, 328.0796; found, 328.0790.

**LOCK-0.** A solution of **compound 2** (250 mg, 0.4 mmol), **compound 3** (130 mg, 0.4 mmol) and piperidine (1 drop) in EtOH (20 mL) was refluxed under nitrogen overnight. After cooling to room temperature, the solvent was removed by evaporation under reduced pressure. The residue was purified with a neutral aluminum oxide column using a DCM and methanol mixture (30:1 v/v) as the eluting solvent to afford a purple powder (191 mg, 50% of yield).  $^1\text{H}$  NMR (400 MHz, DMSO- $d_6$ , ppm):  $\delta$  9.45 (d,  $J = 6.5$  Hz, 1 H), 8.96 (d,  $J = 8.9$  Hz, 1 H), 8.56 (d,  $J = 8.9$  Hz, 1 H), 8.50–8.44 (m, 2 H), 8.23 (t,  $J = 8.0$  Hz, 1 H), 7.93–7.89 (m, 5 H), 7.82–7.78 (m, 13 H), 7.69 (d,  $J = 8.6$  Hz, 2 H), 7.62 (d,  $J = 3.9$  Hz, 1 H), 7.37 (t,  $J = 7.8$  Hz, 4 H), 7.12 (t,  $J = 8.1$  Hz, 6 H), 7.01 (d,  $J = 8.7$  Hz, 2 H), 5.04 (t,  $J = 7.0$  Hz, 2 H), 3.81 (t,  $J = 14.4$  Hz, 2 H), 2.22–2.14 (m, 2 H), 1.73–1.67 (m, 2 H);  $^{13}\text{C}$  NMR (151 MHz, DMSO- $d_6$ , ppm):  $\delta$  152.75, 149.10, 148.45, 147.50, 147.01, 139.57, 138.30, 136.83, 135.41, 134.99, 134.18, 134.11, 130.80, 130.71, 130.25, 129.53, 127.37, 127.07, 126.77, 125.31, 125.01, 124.45, 122.61, 119.71, 119.15, 118.58, 117.88, 115.98, 55.57, 30.33, 30.21, 20.39, 20.05, 19.37. Mass spectrometry (ESI-MS,  $m/z$ ):  $[\text{M}-2\text{Br}]^{2+}$  calcd. for  $\text{C}_{55}\text{H}_{47}\text{N}_2\text{PS}^{2+}$ , 399.1596; found, 399.1593.

**LOCK-1.** The synthesis of **LOCK-1** is similar to that of **LOCK-0**.  $^1\text{H}$  NMR (400 MHz, DMSO- $d_6$ ):  $\delta$  9.44 (d,  $J = 6.2$  Hz, 1 H), 9.03 (d,  $J = 8.5$  Hz, 1 H), 8.55 (d,  $J = 9.0$  Hz, 1 H), 8.45 (d,  $J = 6.3$  Hz, 1 H), 8.24–8.13 (m, 3 H), 8.05 (d,  $J = 8.4$  Hz, 1 H), 8.00 (t,  $J = 7.8$  Hz, 1 H), 7.93–7.87 (m, 6 H), 7.85–7.82 (m, 6 H), 7.78 (w, 6 H), 7.70 (s, 1 H), 7.43–7.39 (m, 3 H), 7.20 (d,  $J = 7.7$  Hz, 4 H), 7.00 (d,  $J = 8.0$  Hz, 2 H), 5.05 (t,  $J = 6.3$  Hz, 2 H), 3.82 (t,  $J = 14.2$  Hz, 2 H), 2.19–2.12 (m, 2 H), 1.72–1.67 (m, 2 H);  $^{13}\text{C}$  NMR (151 MHz, DMSO- $d_6$ ):  $\delta$  153.57, 150.75, 147.44, 146.80, 144.00, 143.46, 141.41, 138.31, 136.29, 135.40, 134.17, 134.10, 131.25, 130.78, 130.70, 130.33, 129.43, 128.67, 126.92, 125.81, 125.03, 124.45, 123.73, 121.29, 120.49, 119.13, 118.56, 117.12, 115.82, 56.48, 30.30, 30.19, 20.40, 20.07, 19.37. Mass spectrometry (ESI-MS,  $m/z$ ):  $[\text{M}-2\text{Br}]^{2+}$  calcd. for  $\text{C}_{53}\text{H}_{45}\text{N}_2\text{PS}^{2+}$ , 386.1518; found, 386.1508.

**LOCK-2.** The synthesis of **LOCK-2** is similar to that of **LOCK-0**.  $^1\text{H}$  NMR (400 MHz, DMSO- $d_6$ ):  $\delta$  9.50 (d,  $J = 6.6$  Hz, 1 H), 9.19 (d,  $J = 8.7$  Hz, 1 H), 9.10 (s, 1 H), 8.59 (d,  $J = 9.0$  Hz, 1 H), 8.55 (d,  $J = 6.8$  Hz, 1 H), 8.41 (d,  $J = 7.7$  Hz, 1 H), 8.37 (d,  $J = 8.5$  Hz, 1 H), 8.23 (d,  $J = 1.8$  Hz, 1 H), 8.11 (d,  $J = 8.7$  Hz, 1 H), 8.00 (d,  $J = 5.4$  Hz, 1 H), 7.91 (t,  $J = 7.1$  Hz, 4 H), 7.88–7.77 (m, 15 H), 7.65–7.63 (m, 2 H), 7.52 (d,  $J = 8.4$  Hz, 2 H), 7.46–7.41 (m, 2 H), 5.08 (t,  $J = 6.9$  Hz, 2 H), 3.83 (t,  $J = 14.6$  Hz, 2 H), 2.22–2.15 (m, 2 H), 1.76–1.67 (m, 2 H);  $^{13}\text{C}$  NMR (151 MHz, DMSO- $d_6$ ):  $\delta$  153.75, 147.58, 145.40, 142.66, 141.87, 141.30, 139.26, 138.39, 135.43, 134.17, 134.10, 130.80, 130.72, 130.29, 129.46, 128.80, 128.44, 127.59, 127.04,

124.95, 124.70, 123.97, 123.47, 123.15, 122.36, 121.42, 119.12, 118.55, 117.41, 115.95, 110.81, 55.63, 30.30, 30.25, 20.39, 20.05, 19.40. Mass spectrometry (ESI-MS,  $m/z$ ):  $[M-2Br]^{2+}$  calcd. for  $C_{53}H_{43}N_2PS^{2+}$ , 385.1440; found, 385.1435.

**Computational simulation.** All theoretical calculation were performed using Gaussian 09 suite of program. Electronic excitation energies were calculated by TD-DFT at the CAM-B3LYP/6-31G(d) level in the treatment of solvent effects (water). In order to simplify the calculation, the number of carbon chains was set from 4 to 2.

**ROS detection by H2DCF.** H2DCF was obtained through hydrolysis of H2DCF-DA. PBS solutions of 10  $\mu$ M AIEgens and 5  $\mu$ M H2DCF were exposed to white light (400-700 nm, 10 mW  $cm^{-2}$ ) irradiation, and then their fluorescence spectra at 523 nm were recorded on an Agilent Cary Eclipse fluorescence spectrophotometer.

**$^1O_2$  yield detection.** The absorption spectra of 5  $\mu$ M AIEgens or RB aqueous solutions were recorded for the determination of  $A_{AIEgen}$  and  $A_{RB}$ , respectively. Then, 50  $\mu$ M ABDA was added to the solutions, and the absorption spectra at 359, 378 and 399 nm were recorded with white light (400-700 nm, 10 mW  $cm^{-2}$ ) or laser irradiation (520 nm for **LOCK-0**, **LOCK-1** and RB, 480 nm for **LOCK-2**, 7 mW  $cm^{-2}$ ). The degradation rates for AIEgens and RB were calculated to be  $K_{AIEgen}$  and  $K_{RB}$ , respectively. Relative to the  $^1O_2$  yield of RB as 0.75, the  $^1O_2$  yields of AIEgens were calculated using the following equation.

$$\Phi_{AIEgen} = \Phi_{RB} \frac{K_{AIEgen} A_{RB}}{K_{RB} A_{AIEgen}}$$

where  $\Phi$  are the  $^1O_2$  yields of RB and AIEgens,  $K$  are the slopes of fitting line of RB and AIEgens,  $A$  are absorbance areas of RB and AIEgens, respectively.

**$^1O_2$  detection by EPR.** 0.5  $\mu$ L TEMP ( $^1O_2$  trapping agent) was added to 100  $\mu$ L, 1.0 mM AIEgens aqueous solutions in dark. The EPR spectra of the resulting mixtures were recorded immediately with or without white light irradiation (400-700 nm, 10 mW  $cm^{-2}$ , 3 min) on a Bruker EMX-8/2.7 electro-spin resonance spectrometer.

**Cell Culture.** HepG2 cells (ATCC<sup>®</sup> HB-8065<sup>™</sup>) were cultured in a Dulbecco's Modified Eagle's Medium (DMEM, Gibco, 12800082) supplemented with 10 % FBS (Gibco, 2025790) in a humidified atmosphere of 5 %  $CO_2$  and 95 % air at 37 °C. Cells were split when reaching 90 % confluency.

**Concentration-dependent washed and wash-free experiments.** HepG2 cells ( $2.5 \times 10^4$  cells per well) were seeded in a black 96-well microplate with optically clear bottom (Greiner bio-one, 655090) and cultured in a humidified atmosphere of 5 % CO<sub>2</sub> and 95 % air at 37 °C overnight. Then, cells were incubated sequentially with Hoechst 33342 ( $5 \mu\text{g} \cdot \text{mL}^{-1}$ ) for 5 min and AIEgens (0, 0.625, 1.25, 2.5, 5.0  $\mu\text{M}$ ) for 1 h, and rinsed with (for washed experiments) or without (for washed-free experiments) PBS before imaging. The fluorescence intensities were recorded using an Opera Phenix high content imaging system (Perkinelmer, US) and quantified and plotted by Columbus analysis system (Perkinelmer, US). **LOCK-2** channel excitation at 488 nm, emission at 570-630 nm; **LOCK-0** and **LOCK-1** channel excitation at 561 nm, emission at 650-760 nm; Hoechst 33342 channel excitation at 405 nm, emission at 410-480 nm.

**Photostability.** HepG2 cells were seeded in a black 96-well microplate with optically clear bottom (Greiner bio-one, 655090) in growth media supplemented with 10 % FBS and cultured overnight, and then treated with AIEgens (5.0  $\mu\text{M}$ ) for 1 h. After replacing the medium with fresh growth medium, cells were continuously imaged for 60 times (1 time/min) using an Opera Phenix high content imaging system (Perkinelmer, US) and quantified and plotted by Columbus analysis system (Perkinelmer, US).

**Co-localization Experiment.** HepG2 cells cultured in growth medium supplemented with 10 % FBS were added to a 24-well microplate (Corning, 3524), and cells were maintained in a humidified atmosphere of 5 % CO<sub>2</sub> and 95 % air at 37 °C overnight. Then the cells were incubated sequentially with AIEgens (5.0  $\mu\text{M}$ ) for 1 h, MitoTracker<sup>®</sup> Deep Red or LysoTracker<sup>®</sup> Deep Red (200 nM) for 40 min, and Hoechst 33342 ( $5 \mu\text{g} \cdot \text{mL}^{-1}$ ) for 5 min. And cells were rinsed twice with warm PBS and fixed with 4% paraformaldehyde for 15 min at room temperature. After sealing, the fluorescence was detected and photographed using confocal laser scanning microscopy (Leica TCS SP8, Leica Microsystems, Wetzlar, Germany). **LOCK-2** channel excitation at 488 nm, emission at 570-650 nm; **LOCK-0** and **LOCK-1** channel excitation at 562 nm, emission at 600-800 nm; MitoTracker<sup>®</sup> Deep Red, LysoTracker<sup>®</sup> Deep Red channel excitation at 638 nm, emission at 648-710 nm; Hoechst 33342 channel excitation at 405 nm, emission at 415-487 nm.

**ROS detection in cells.** The intracellular ROS was further quantified using the Reactive Oxygen Species Assay Kit (MCE, HY-D0940). Briefly, HepG2 cells were seeded in a 96-well



plate (Greiner bio-one, 655090) in growth media supplemented with 10 % FBS and cultured overnight. And treated sequentially with AIEgens (40  $\mu\text{M}$ ) for 1 h and H2DCF-DA (10  $\mu\text{M}$ ) for 30 mins. Then, replace the medium with fresh one. Thereafter, the cells were irradiated with white light (22.7  $\text{mW}\cdot\text{cm}^{-2}$ ) for 1 h. After rinsed with warm PBS, the fluorescence intensities were recorded by Opera Phenix high content imaging system and quantified and plotted by Columbus analysis system (Perkinelmer, US). DCFH-DA channel excitation at 488 nm, emission at 500-550 nm. The intracellular ROS level was directly proportional to the fluorescence intensity.

**Annexin V-FITC/PI co-stain experiments.** HepG2 cells ( $2.5\times 10^4$  cells per well) were seeded in a black 96-well microplate with optically clear bottom (Greiner bio-one, 655090) and cultured overnight. Then, cells were treated with AIEgens at different concentrations (0, 10, 20, 40  $\mu\text{M}$ ) for 1 h. Then replace medium with fresh one. Thereafter, the cells were irradiated using white light (22.7  $\text{mW}\cdot\text{cm}^{-2}$ ) for 2 h, and then incubated with the mixture of Annexin V-FITC and PI solution (1:100 diluted by serum-free medium) for 30 min, and then washed by PBS. The fluorescence intensities were recorded using an Opera Phenix high content imaging system (Perkinelmer, US) and quantified and plotted by Columbus analysis system (Perkinelmer, US). Annexin V-FITC Channel excitation at 488 nm, emission at 500-550 nm; PI channel excitation at 561 nm, emission at 570-630 nm.

**Cell viability assay.** HepG2 Cells were seeded onto clear bottom 96-well plates (Corning, 3599) in growth medium supplemented with 10 % FBS and cultured overnight. Then the cells were treated with AIEgens of different concentrations (0, 10, 20, and 40  $\mu\text{M}$ ) for 1 h. After replacing the culture medium to fresh one, HepG2 cells were irradiated with white light (22.7  $\text{mW}\cdot\text{cm}^{-2}$ ) for 2 h. After further incubation of 24 h, a solution of MTS/PMS (20:1, Promega Corp, G5430) (20  $\mu\text{L}$  per well) was added to each well. After incubation at 37  $^{\circ}\text{C}$  under 5 %  $\text{CO}_2$  for 3 h, the absorbance of the solutions was measured at 490 nm using a M5 microplate reader (Molecular Device, USA).

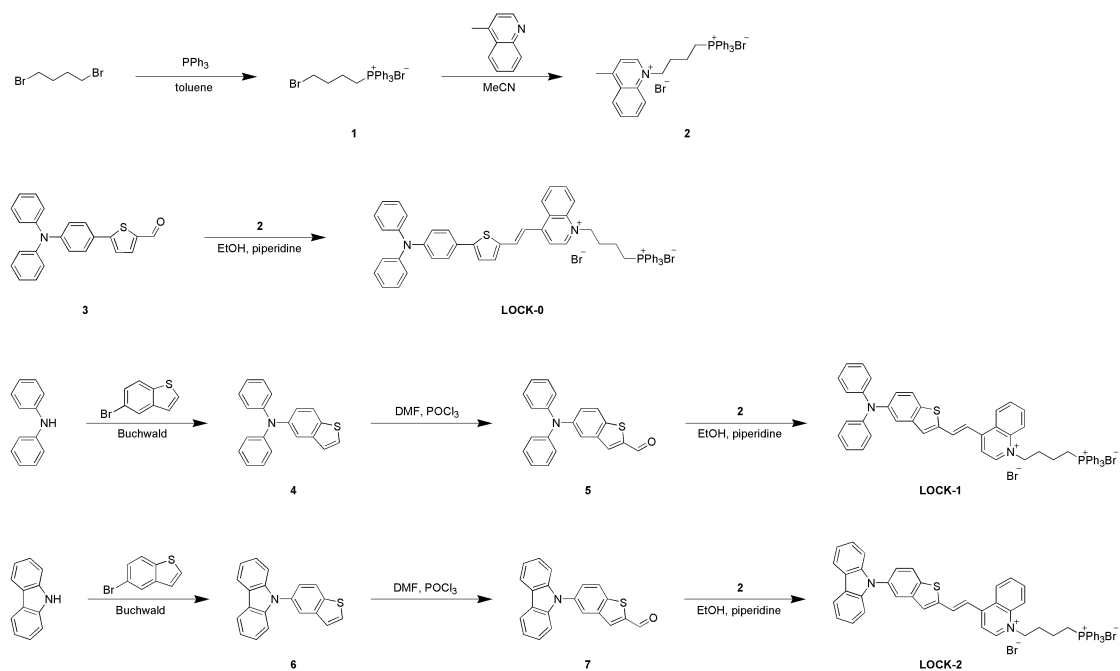

**Scheme S1** Synthetic routes of **LOCK-0**, **LOCK-1**, and **LOCK-2**.

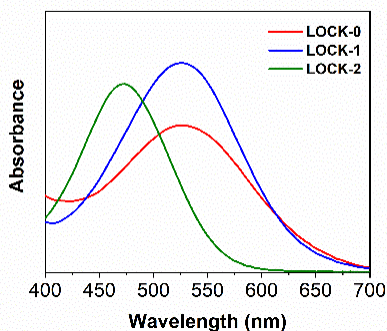

**Fig. S1** UV-visible absorption spectra of **LOCK-0**, **LOCK-1** and **LOCK-2** in aqueous solution. AIEgen concentration: 10  $\mu\text{M}$ .

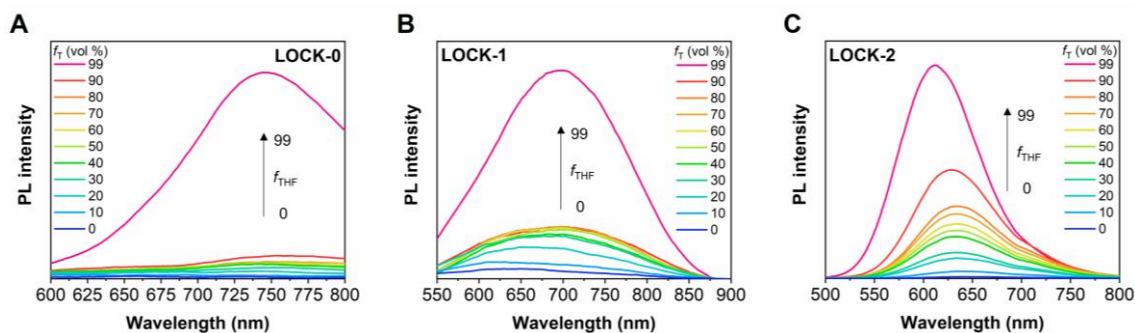

**Fig. S2** PL spectra of **LOCK-0** (A), **LOCK-1** (B) and **LOCK-2** (C) in THF/H<sub>2</sub>O solution.

AI Egen concentration: 10  $\mu\text{M}$ .  $\lambda_{\text{exc}}$ : **LOCK-0** and **LOCK-1**: 523 nm; **LOCK-2**: 473 nm.

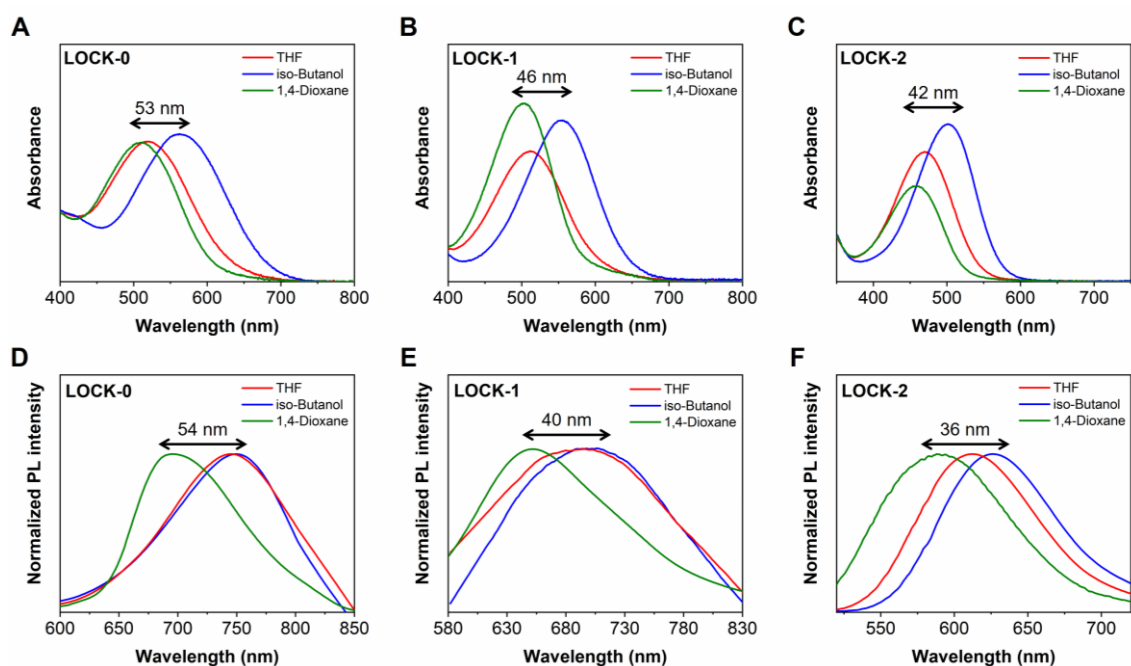

**Fig. S3** Solvent effect experiments of **LOCK-0**, **LOCK-1** and **LOCK-2**. Absorption spectra of **LOCK-0** (A), **LOCK-1** (B) and **LOCK-2** (C) in THF, iso-butanol or 1,4-dioxane solution. AI Egen concentration: 10  $\mu\text{M}$ . Normalized PL spectra of **LOCK-0** (D), **LOCK-1** (E) and **LOCK-2** (F) in THF, iso-butanol or 1,4-dioxane solution. AI Egen concentration: 10  $\mu\text{M}$ .

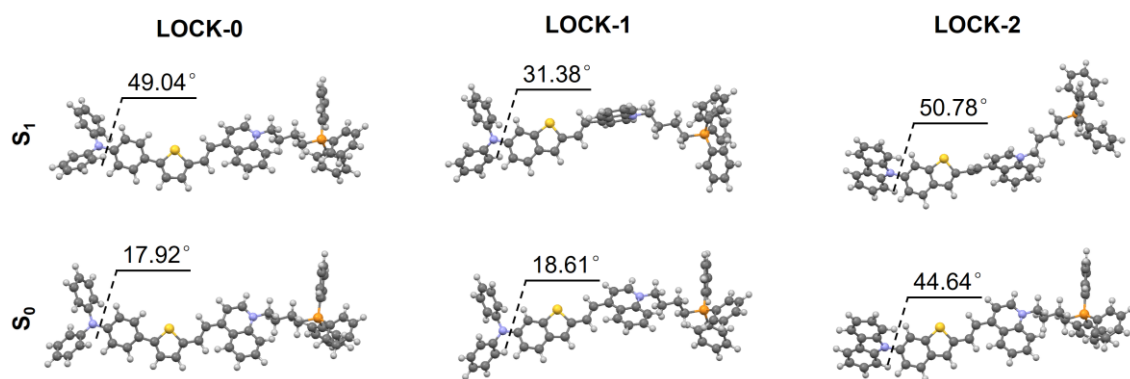

**Fig. S4** Dihedral angles ( $\theta$ ) of **LOCK-0**, **LOCK-1** and **LOCK-2** at ground state ( $S_0$ ) and  $S_1$  excited state.

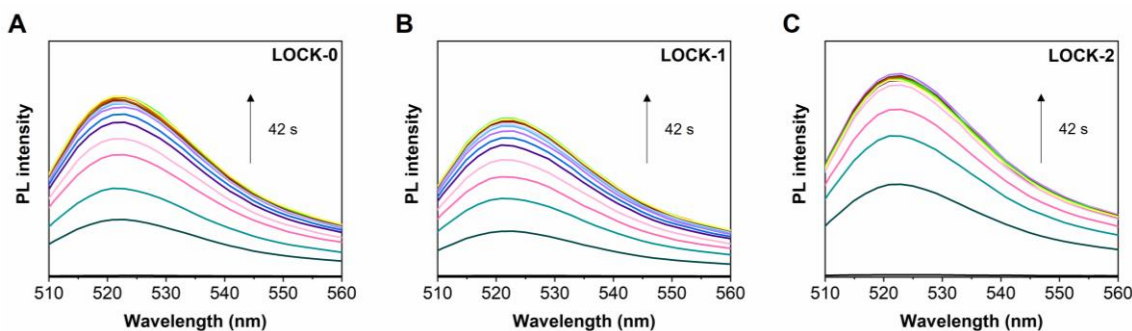

**Fig. S5** ROS detection by H2DCF for **LOCK-0**, **LOCK-1** and **LOCK-2**. PL spectra of H2DCF with **LOCK-0** (A), **LOCK-1** (B) and **LOCK-2** (C) under different time of white light irradiation. AIEgen concentration: 10  $\mu\text{M}$ . H2DCF concentration: 5  $\mu\text{M}$ . White light: 400-700 nm, 10  $\text{mW cm}^{-2}$ .  $\lambda_{\text{ex}}$ : 488 nm.

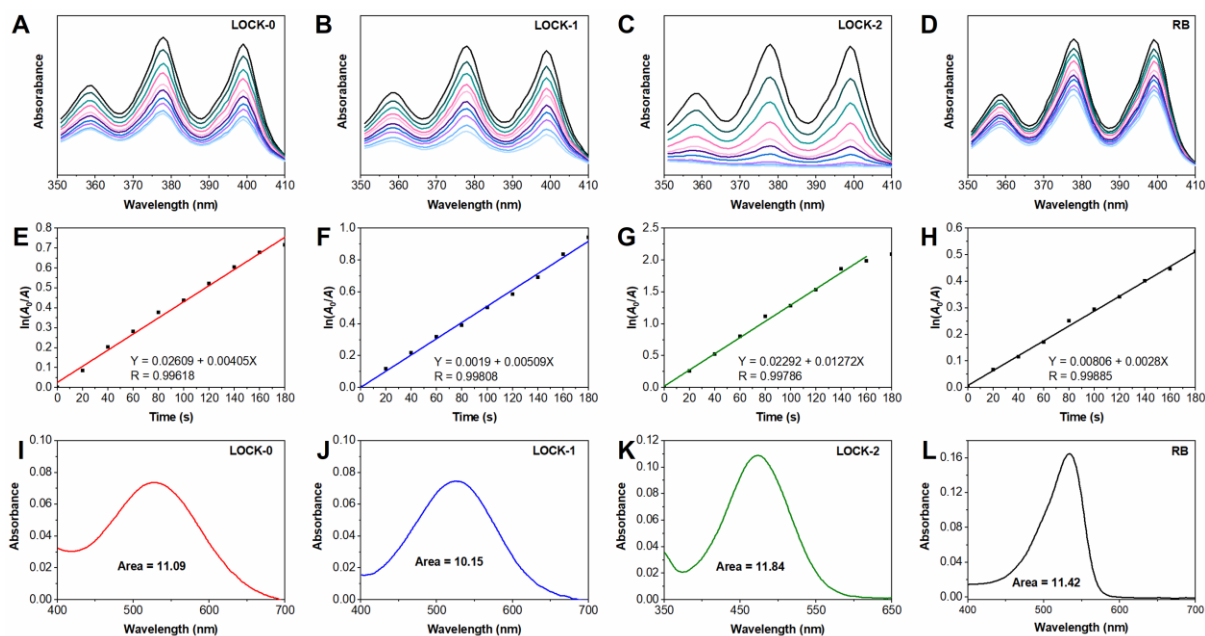

**Fig. S6** Measurement and calculation of  $^1\text{O}_2$  yields of **LOCK-0**, **LOCK-1** and **LOCK-2** under white light irradiation. UV-visible absorption spectra of ABDA aqueous solution with **LOCK-0** (A), **LOCK-1** (B), **LOCK-2** (C) and RB (D) under different time of white light irradiation. Linear fitting of absorbance area of ABDA at 359, 378 and 399 nm with **LOCK-0** (E), **LOCK-1** (F), **LOCK-2** (G) and RB (H). UV-visible absorption spectra of **LOCK-0** (I), **LOCK-1** (J), **LOCK-2** (K) and RB (L). AIEgen concentration: 5  $\mu\text{M}$ . ABDA concentration: 50  $\mu\text{M}$ . White light: 400-700 nm, 10  $\text{mW cm}^{-2}$ .

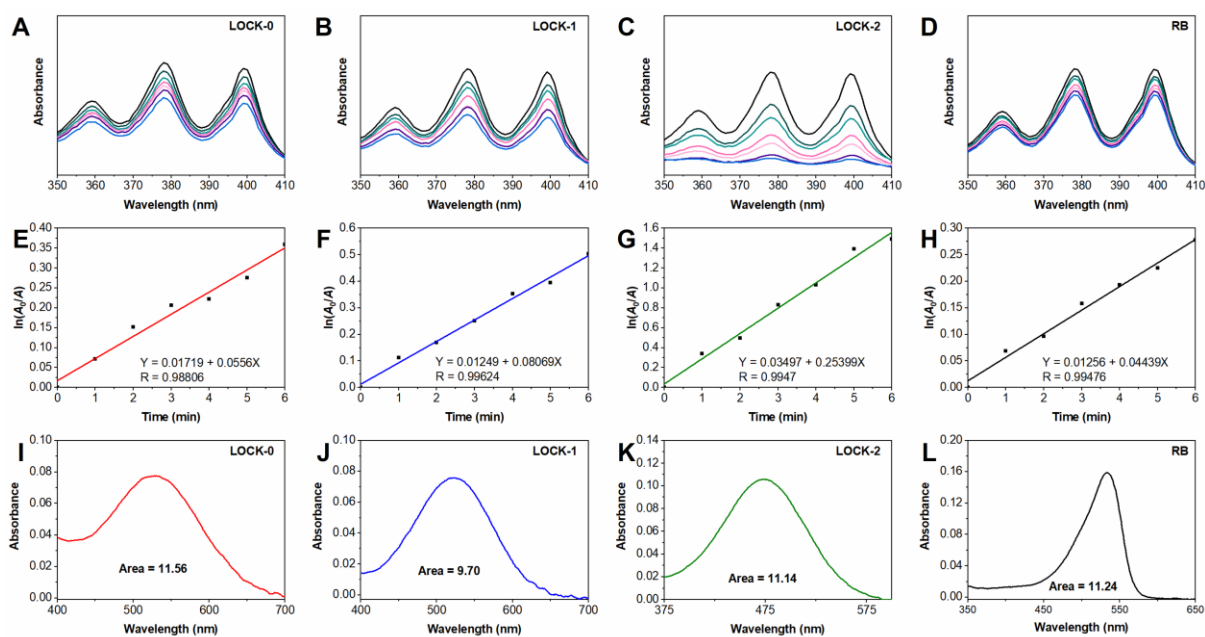

**Fig. S7** Measurement and calculation of  $^1\text{O}_2$  yields of **LOCK-0**, **LOCK-1** and **LOCK-2** under 480 or 520 nm laser irradiation. UV-visible absorption spectra of ABDA aqueous solution with **LOCK-0** (A), **LOCK-1** (B), **LOCK-2** (C) and RB (D) under 480 or 520 nm laser irradiation. Linear fitting of absorbance area of ABDA at 359, 378 and 399 nm with **LOCK-0** (E), **LOCK-1** (F), **LOCK-2** (G) and RB (H). UV-visible absorption spectra of **LOCK-0** (I), **LOCK-1** (J), **LOCK-2** (K) and RB (L). AIEgen concentration: 5  $\mu\text{M}$ . ABDA concentration: 50  $\mu\text{M}$ . Laser: 520 nm laser for **LOCK-0**, **LOCK-1** and RB, 480 nm laser for **LOCK-2**, 7  $\text{mW cm}^{-2}$ .

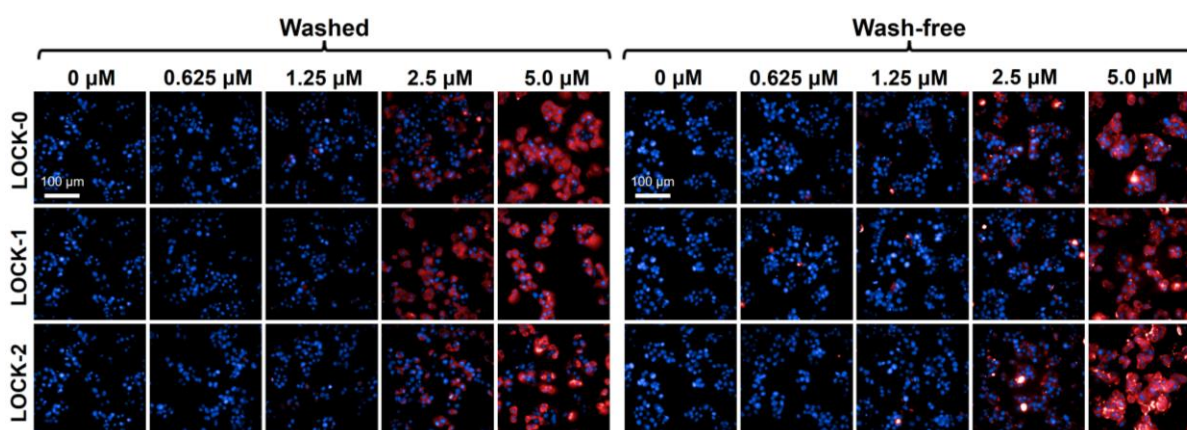

**Fig. S8** Concentration-dependent fluorescence imaging by confocal laser-scanning of HepG2 cells with **LOCK-0**, **LOCK-1** and **LOCK-2** in washed and wash-free manner. Hoechst 33342 concentration: 5  $\mu\text{g mL}^{-1}$ . The scale bar of all images: 100  $\mu\text{m}$ . Excitation source: Hoechst 33342: 405 nm; **LOCK-0**: 561 nm; **LOCK-1**: 561 nm; **LOCK-2**: 488 nm. The emission filter:

Hoechst 33342: 410-480 nm; **LOCK-0**: 650-760 nm; **LOCK-1**: 650-760 nm; **LOCK-2**: 570-630 nm.

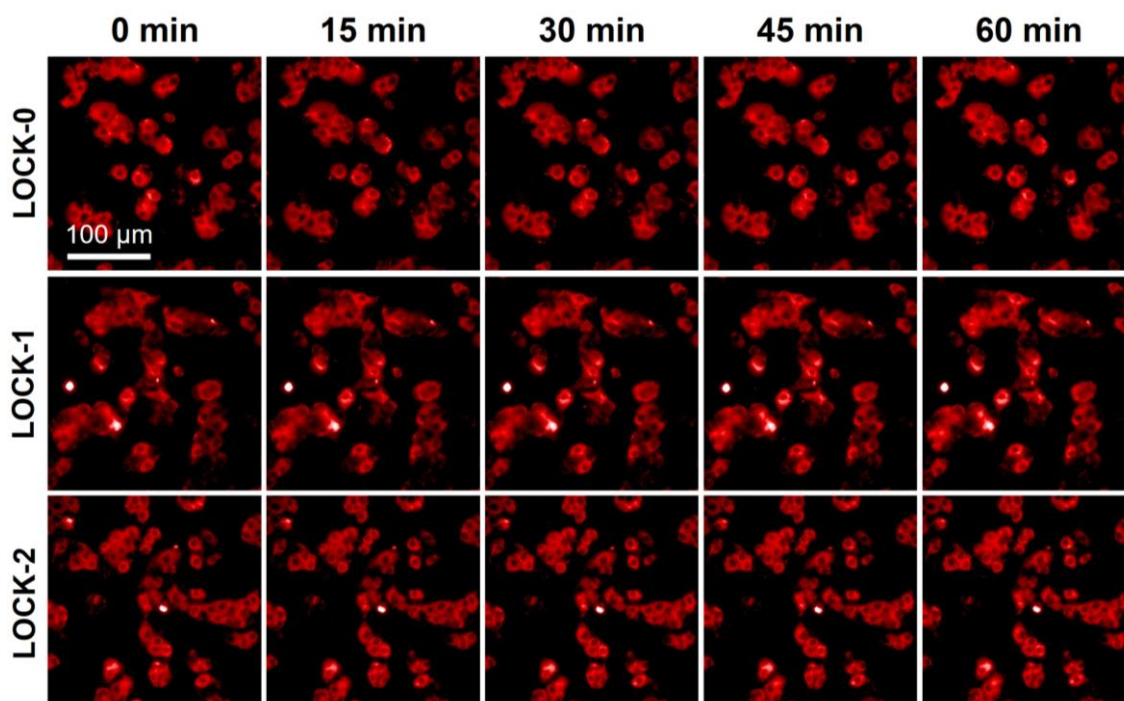

**Fig. S9** Successive fluorescence imaging by confocal laser-scanning of HepG2 cells with **LOCK-0**, **LOCK-1** and **LOCK-2**. AIEgen concentration: 5  $\mu$ M. Scanning: 60 times, 1 time/min. The scale bar of all images: 100  $\mu$ m. Excitation source: **LOCK-0**: 561 nm; **LOCK-1**: 561 nm; **LOCK-2**: 488 nm. The emission filter: **LOCK-0**: 650-760 nm; **LOCK-1**: 650-760 nm; **LOCK-2**: 570-630 nm.

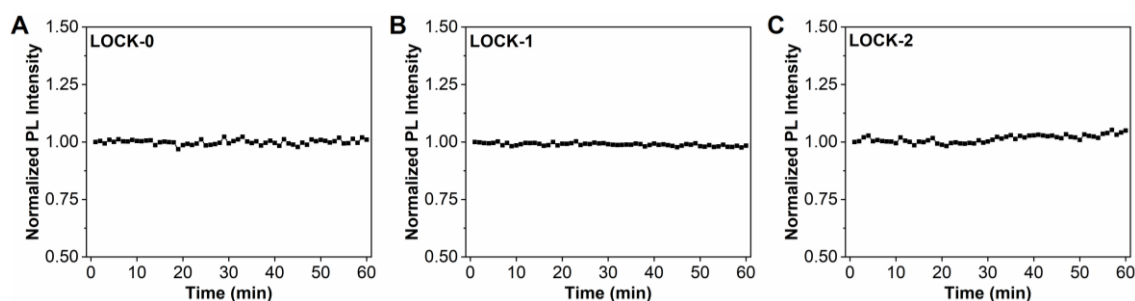

**Fig. S10** Fluorescence quantification of HepG2 cells treated with **LOCK-0**, **LOCK-1** and **LOCK-2** in the photostability experiments.

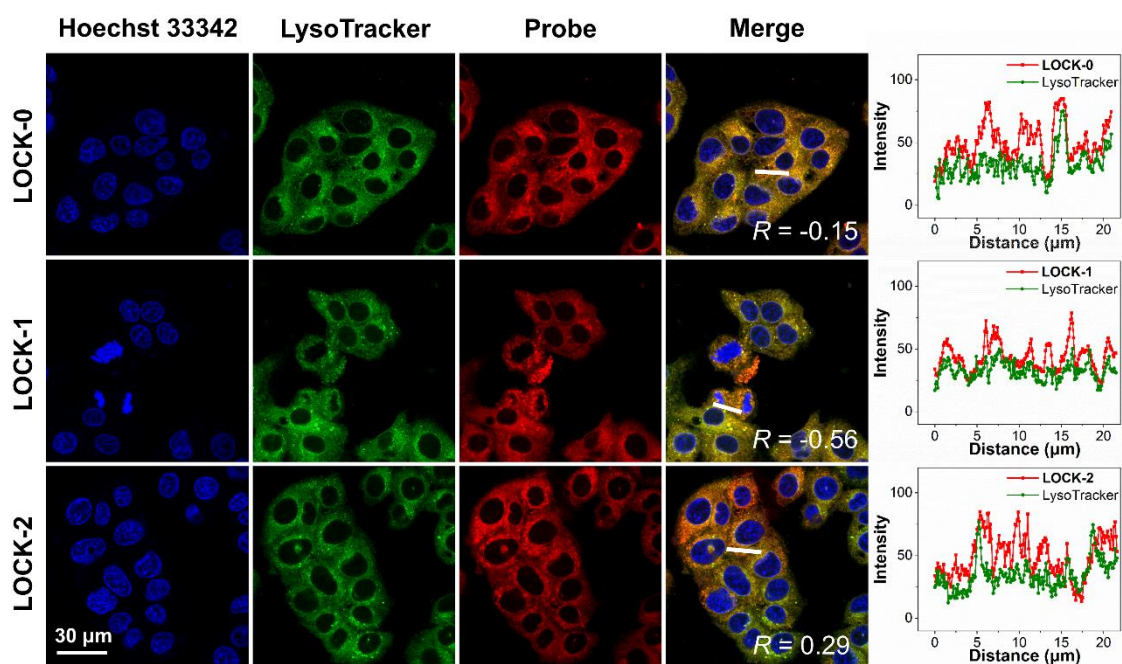

**Fig. S11** Fluorescence imaging and quantification of a selected section of HepG2 cells with **LOCK-0**, **LOCK-1** and **LOCK-2** co-stained with LysoTracker<sup>®</sup> Deep Red by confocal laser-scanning microscopy. Hoechst 33342 concentration: 5  $\mu\text{g mL}^{-1}$ . LysoTracker<sup>®</sup> Deep Red concentration: 200 nM. AIEgen concentration: 5  $\mu\text{M}$ . The scale bar of all images: 30  $\mu\text{m}$ . Excitation source: Hoechst 33342: 405 nm; LysoTracker<sup>®</sup> Deep Red: 638 nm; **LOCK-0**: 562 nm; **LOCK-1**: 562 nm; **LOCK-2**: 488 nm. The emission filter: Hoechst 33342: 415-487 nm; LysoTracker<sup>®</sup> Deep Red: 648-710 nm; **LOCK-0**: 600-800 nm; **LOCK-1**: 600-800 nm; **LOCK-2**: 570-650 nm.

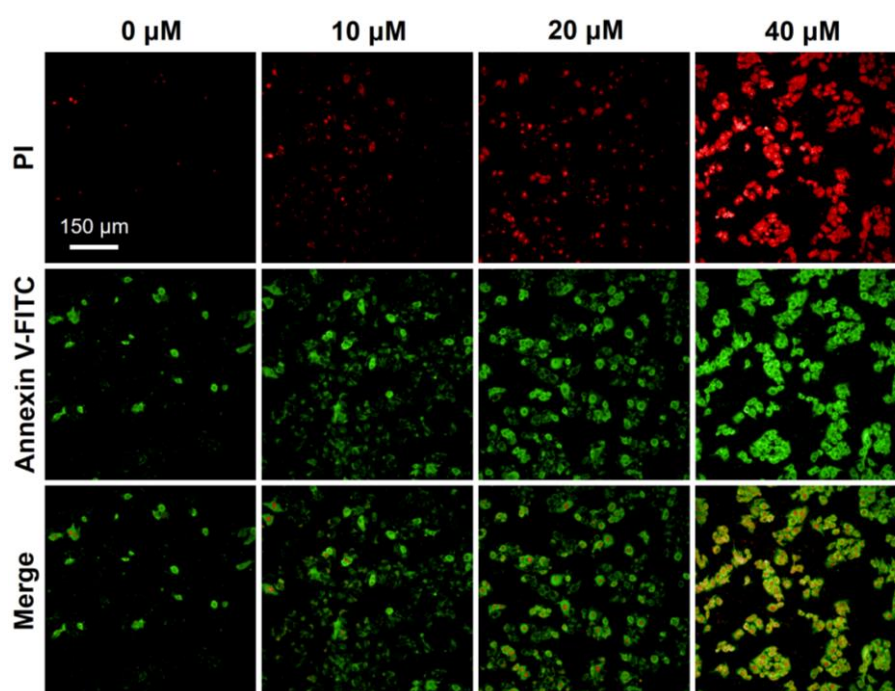

**Fig. S12** Fluorescence imaging of HepG2 cells with **LOCK-2** stained with PI, Annexin V-FITC with white light irradiation by confocal laser-scanning microscopy. Annexin V-FITC/PI concentration: 1:100 of stock solution. Excitation source: PI: 561 nm; Annexin V-FITC: 488 nm. The emission filter: PI: 570-630 nm; Annexin V-FITC: 500-550 nm. Irradiation time: 2 h. White light: 22.7 mW cm<sup>-2</sup>.

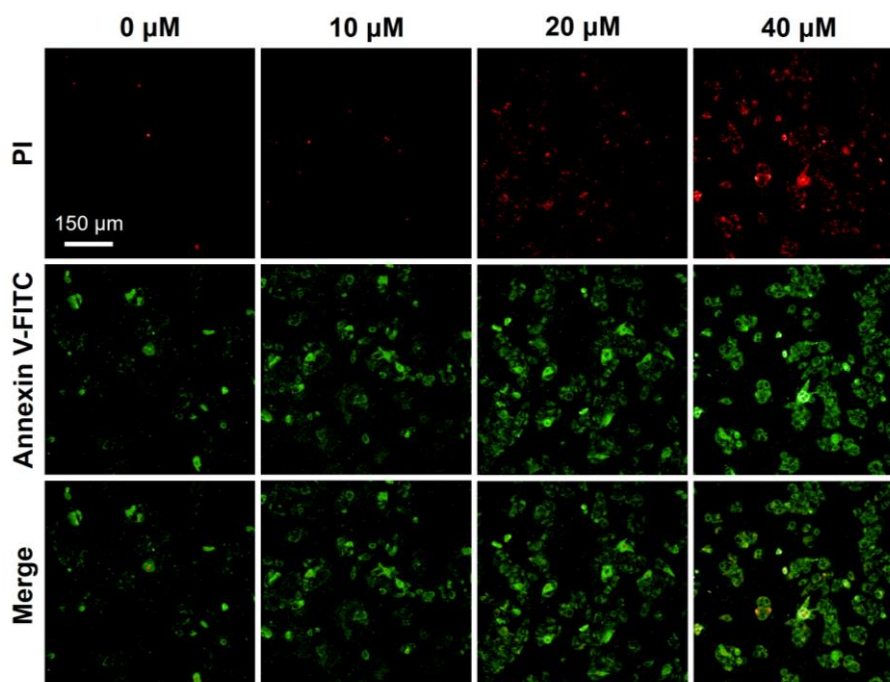

**Fig. S13** Fluorescence imaging of HepG2 cells with **LOCK-2** stained with PI, Annexin V-



FITC without white light irradiation by confocal laser-scanning microscopy. Annexin V-FITC/PI concentration: 1:100 of stock solution. Excitation source: PI: 561 nm; Annexin V-FITC: 488 nm. The emission filter: PI: 570-630 nm; Annexin V-FITC: 500-550 nm. Irradiation time: 2 h. White light: 22.7 mW cm<sup>-2</sup>.

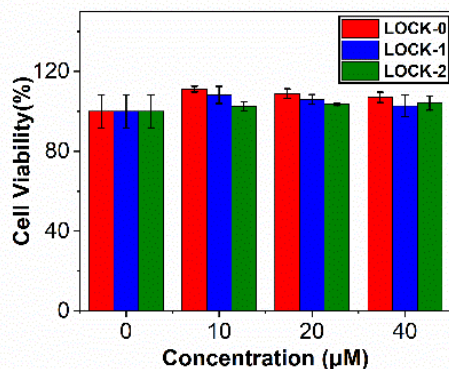

**Fig. S14** Cell viability of HepG2 cells after treatment of various concentrations of **LOCK-0**, **LOCK-1** and **LOCK-2** in dark for 24 h.

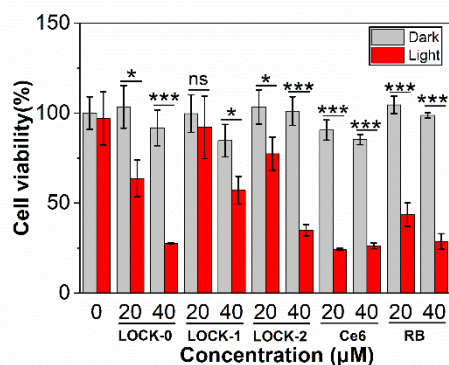

**Fig. S15** Cell viability of HepG2 cells after treatment with various concentrations of **LOCK-0**, **LOCK-1**, **LOCK-2**, Ce6 and RB with and without white light irradiation. Irradiation time: 2 h. White light: 22.7 mW cm<sup>-2</sup>. \*\*\* $P < 0.001$ , \* $P < 0.05$ , ns: not significant.

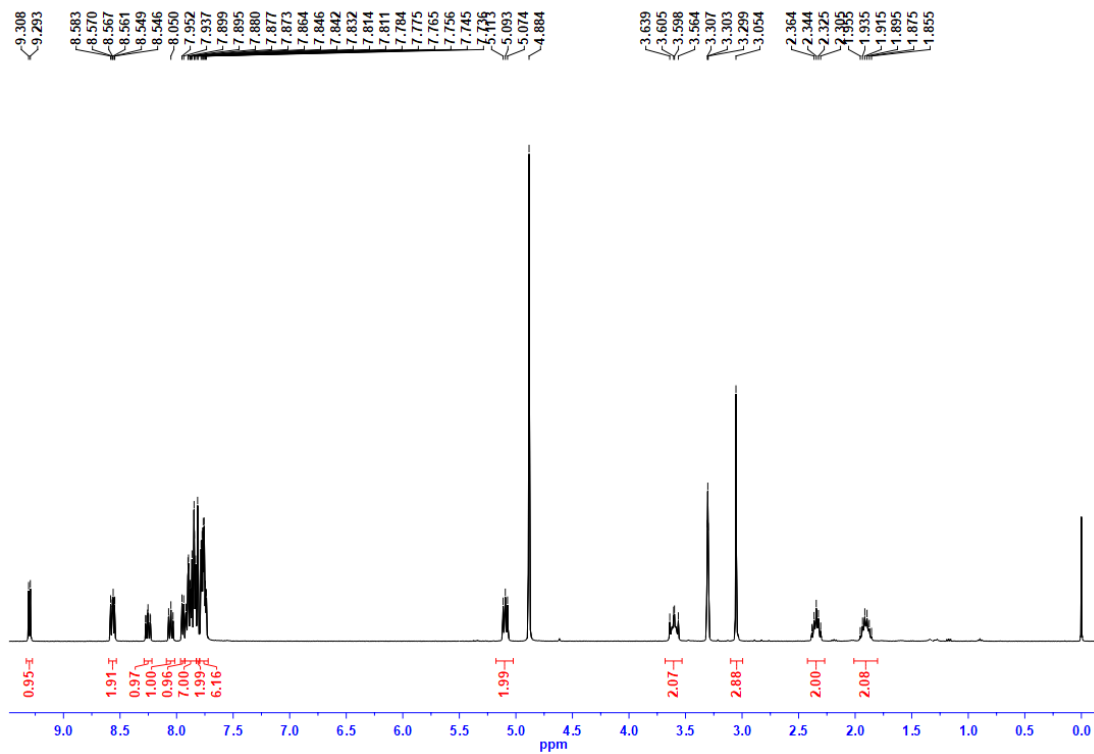

Fig. S16  $^1\text{H}$  NMR spectrum of **compound 2** in  $\text{CD}_3\text{OD}$ .

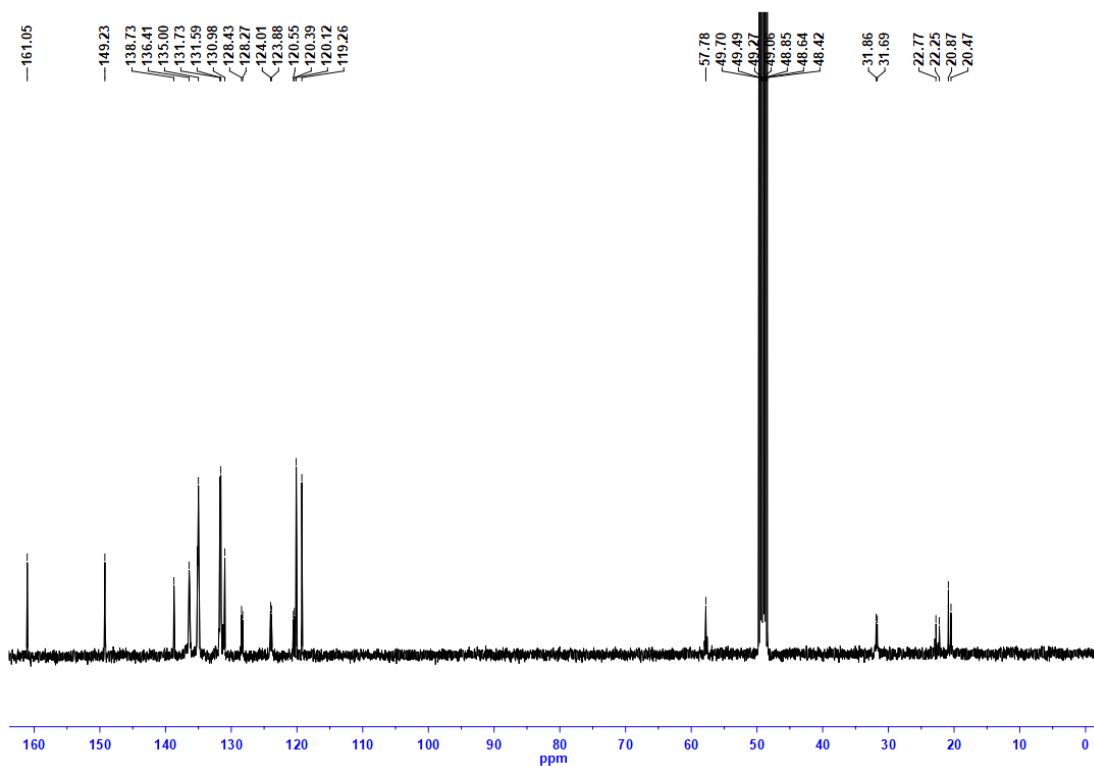

Fig. S17  $^{13}\text{C}$  NMR spectrum of **compound 2** in  $\text{CD}_3\text{OD}$ .

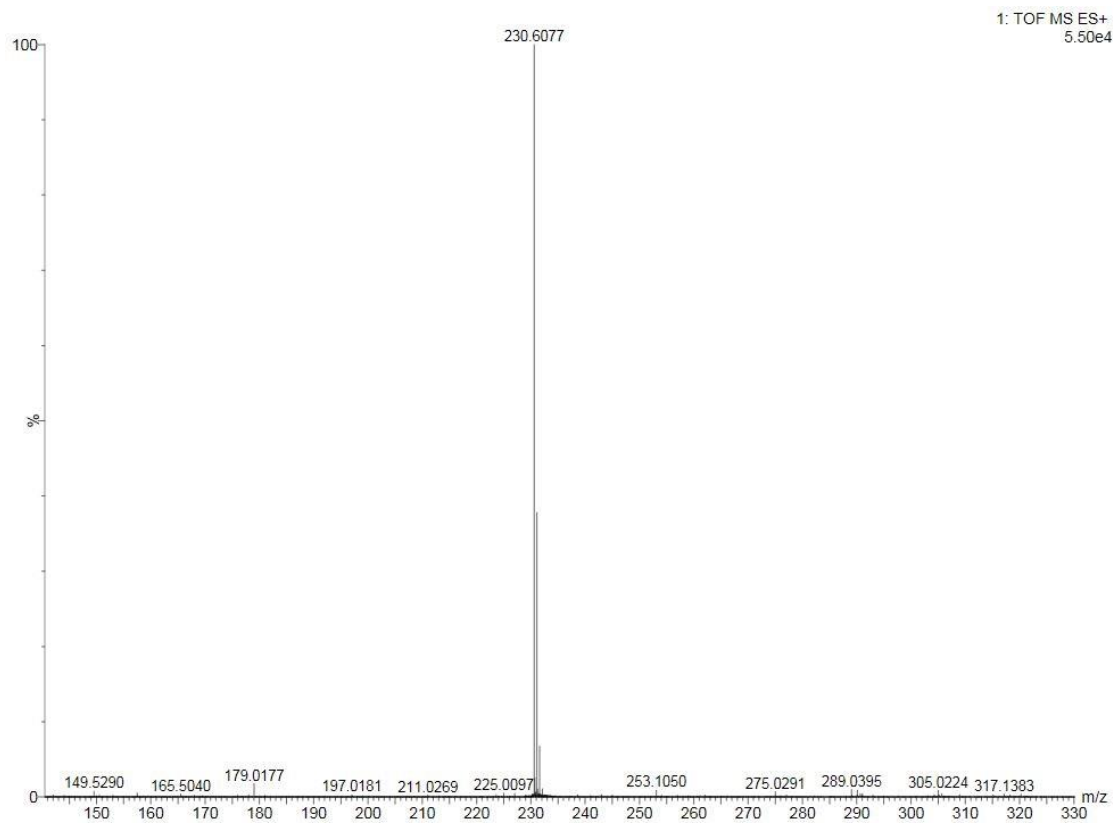

**Fig. S18** HRMS spectrum of **compound 2**.

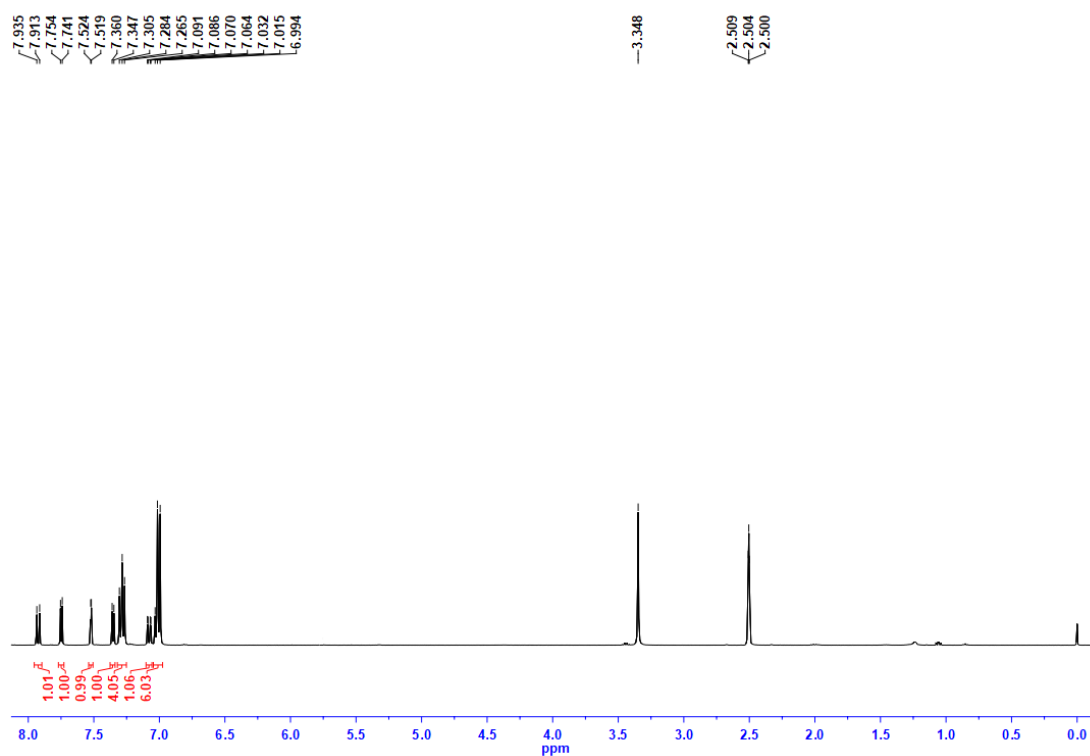

**Fig. S19**  $^1\text{H}$  NMR spectrum of **compound 4** in  $\text{DMSO-}d_6$ .

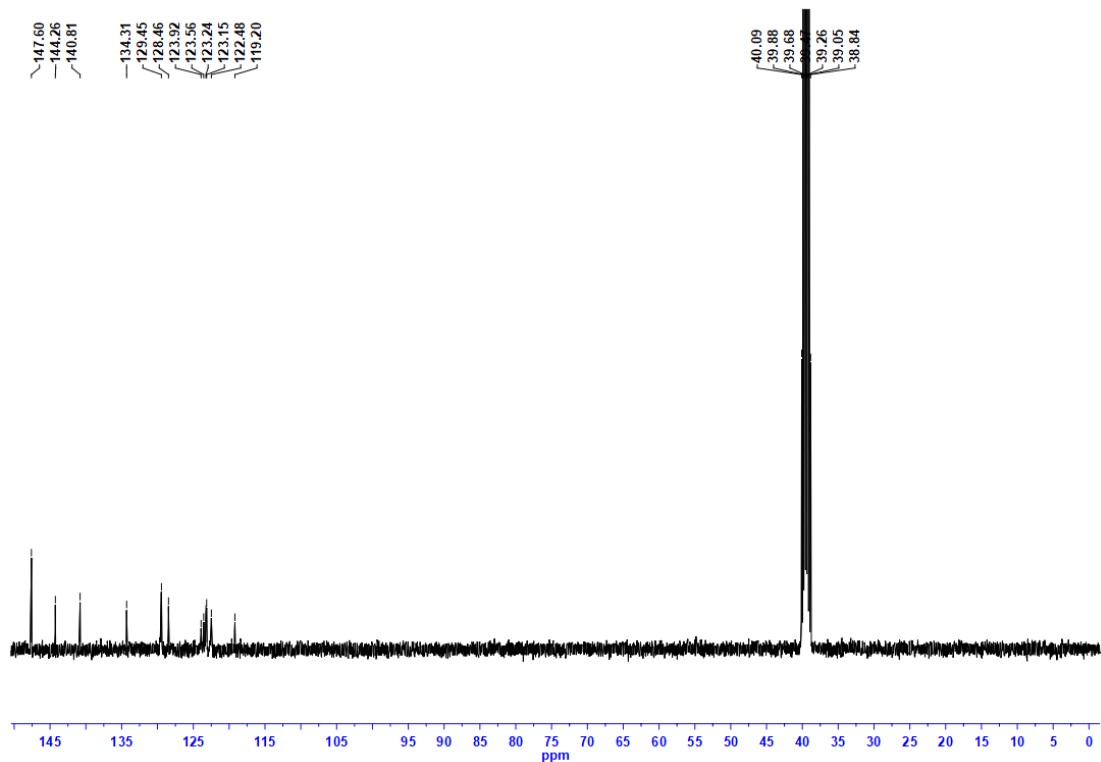

**Fig. S20**  $^{13}\text{C}$  NMR spectrum of **compound 4** in  $\text{DMSO-}d_6$ .

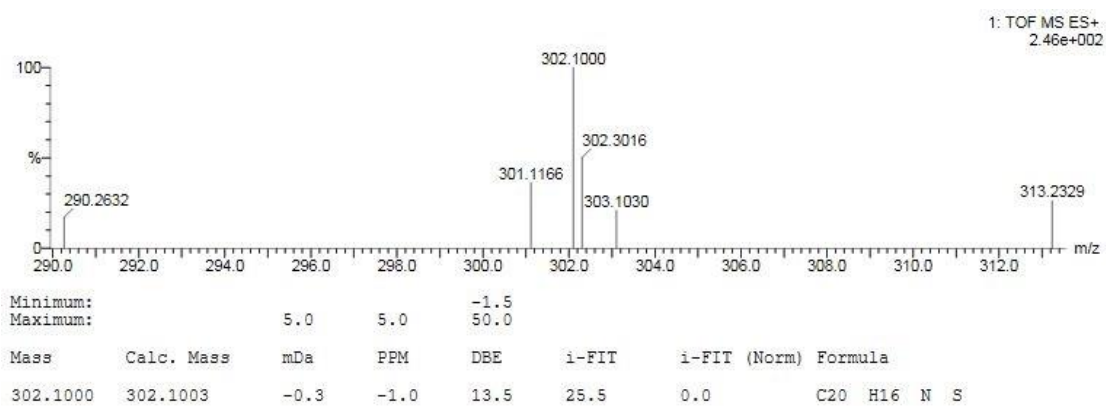

**Fig. S21** HRMS spectrum of **compound 4**.

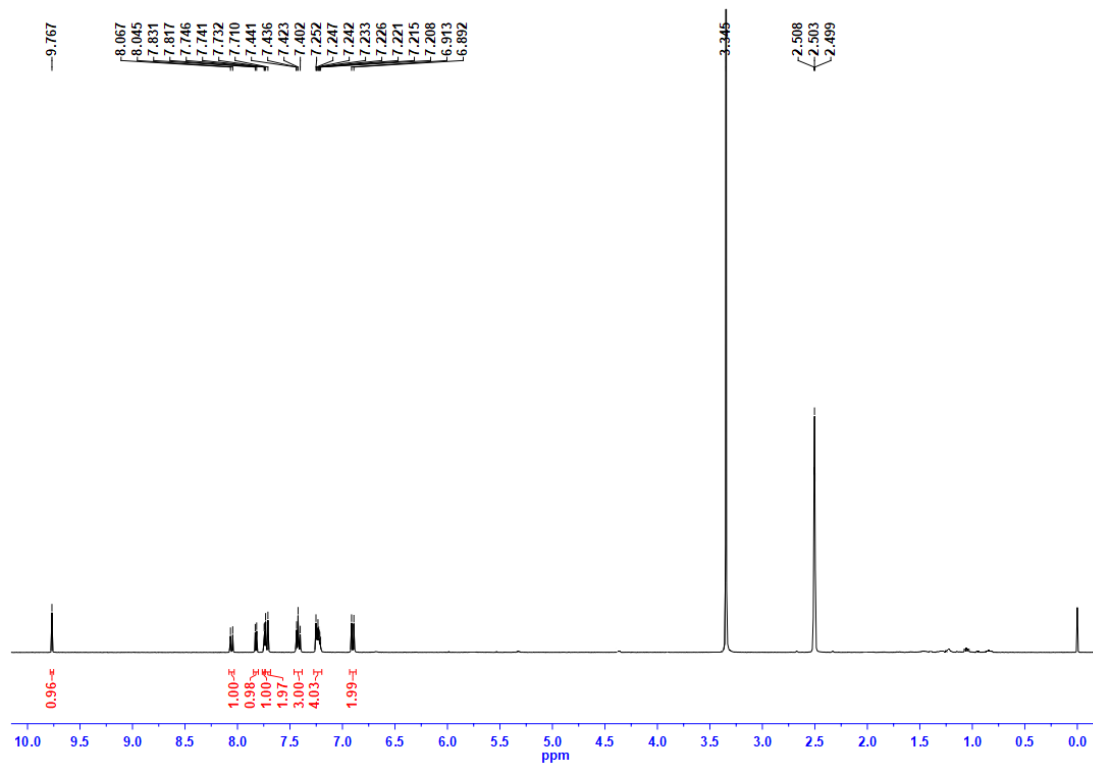

Fig. S22  $^1\text{H}$  NMR spectrum of **compound 5** in  $\text{DMSO-}d_6$ .

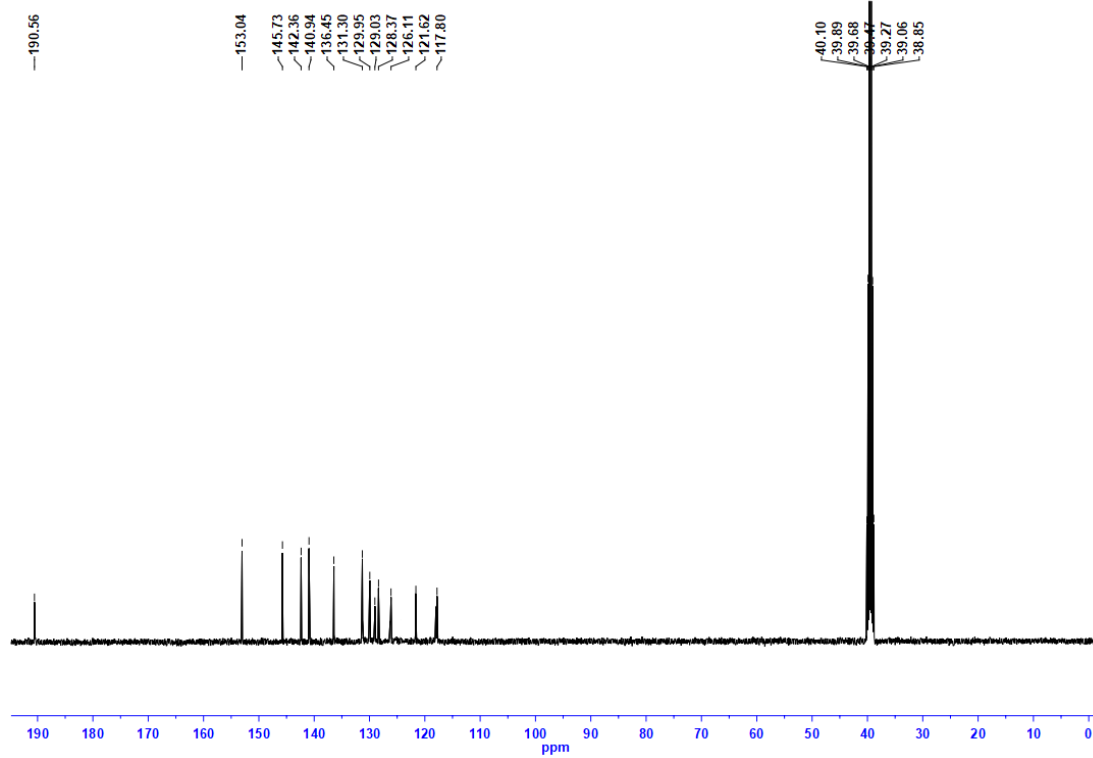

Fig. S23  $^{13}\text{C}$  NMR spectrum of **compound 5** in  $\text{DMSO-}d_6$ .

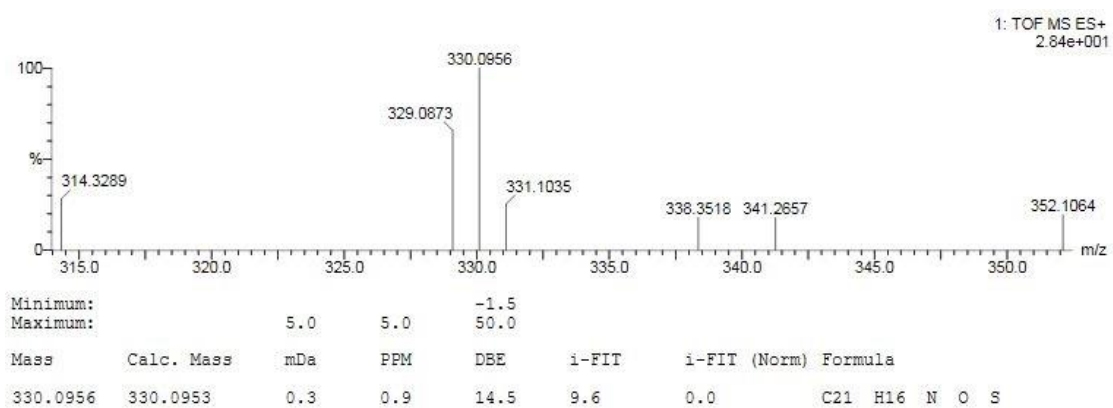

**Fig. S24** HRMS spectrum of **compound 5**.

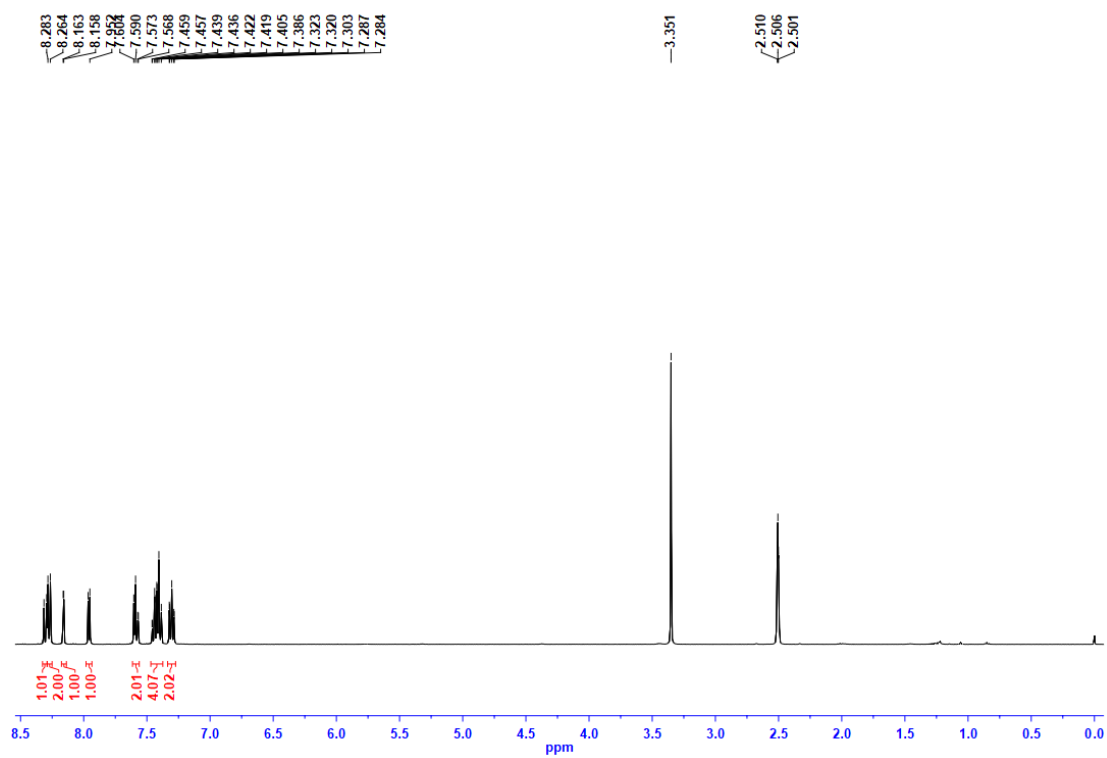

**Fig. S25**  $^1\text{H}$  NMR spectrum of **compound 6** in  $\text{DMSO-}d_6$ .

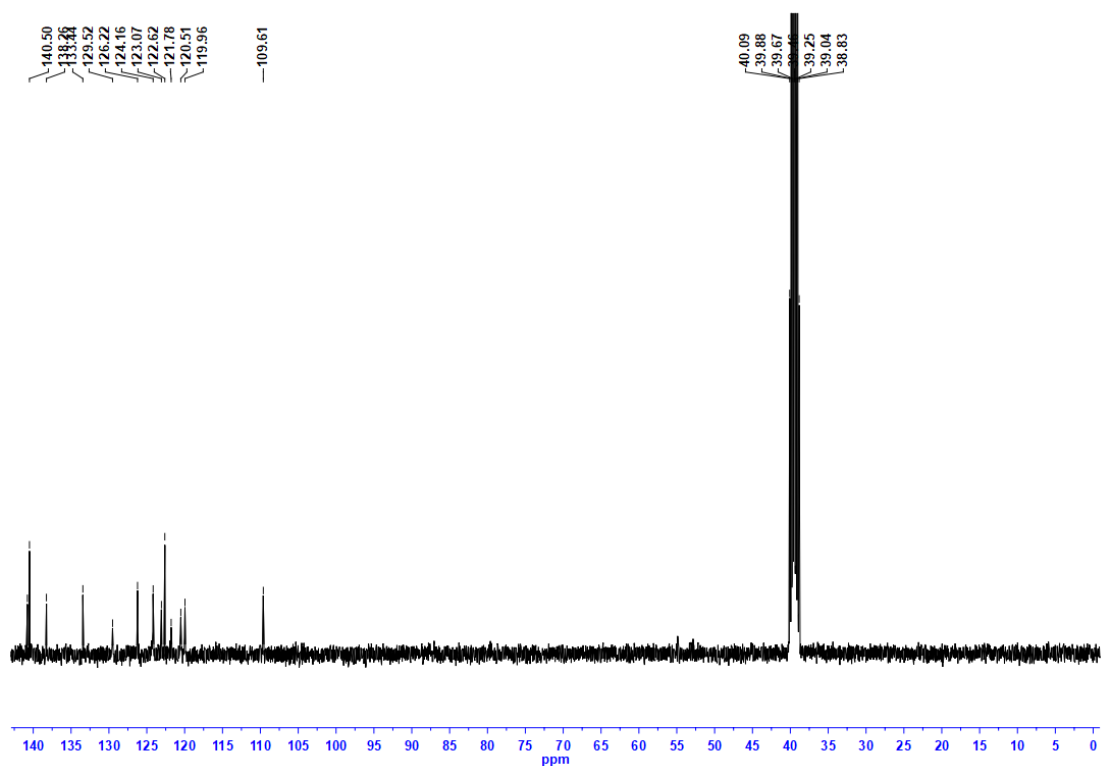

**Fig. S26**  $^{13}\text{C}$  NMR spectrum of **compound 6** in  $\text{DMSO-}d_6$ .

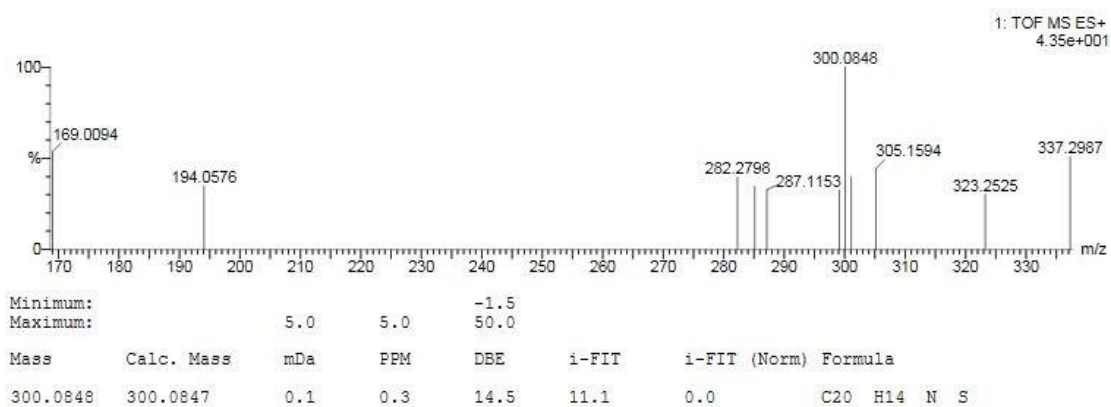

**Fig. S27** HRMS spectrum of **compound 6**.

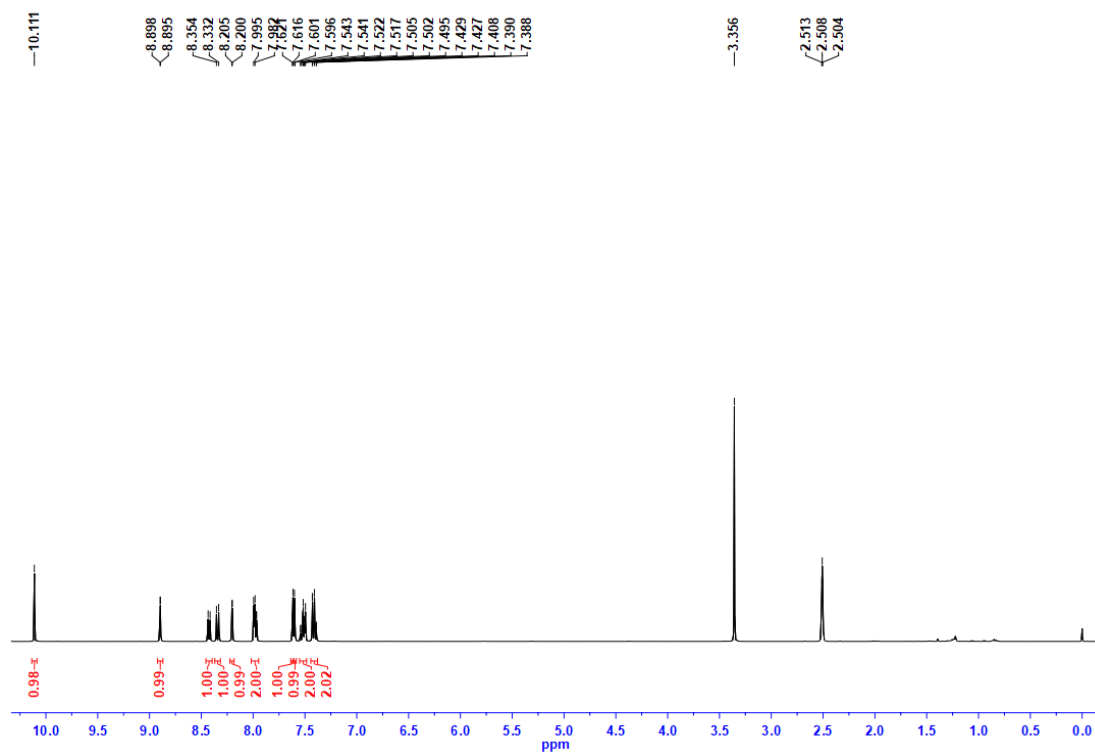

Fig. S28  $^1\text{H}$  NMR spectrum of **compound 7** in  $\text{DMSO-}d_6$ .

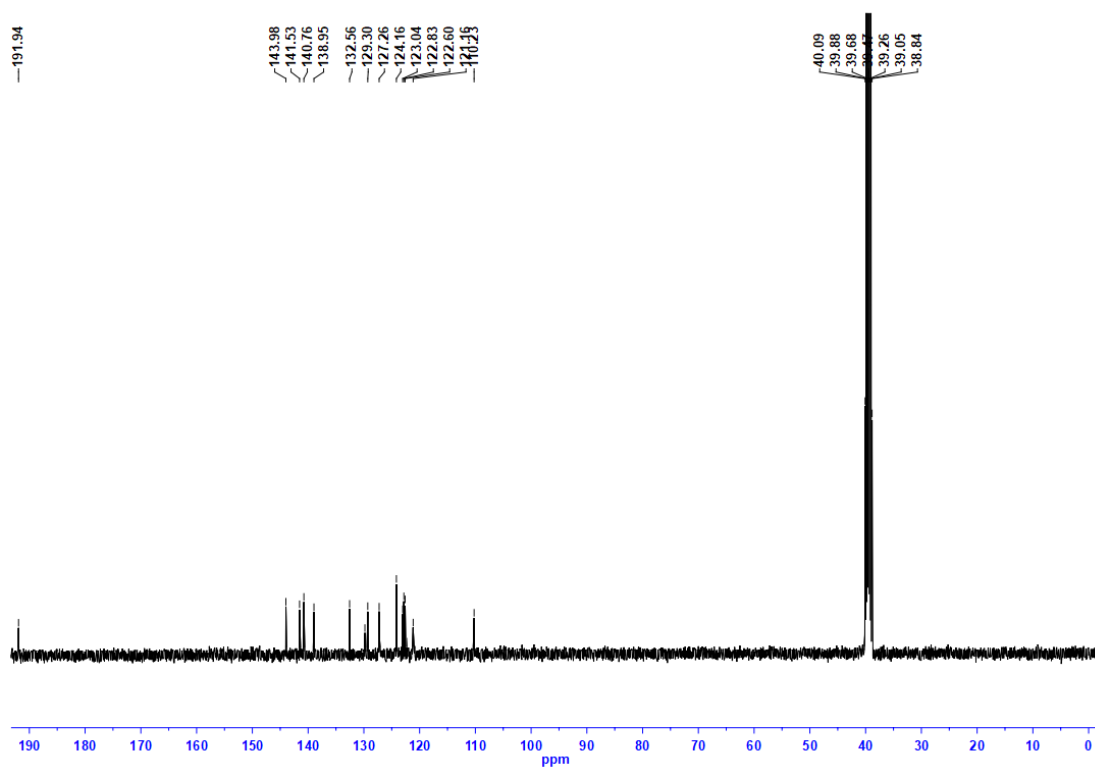

Fig. S29  $^{13}\text{C}$  NMR spectrum of **compound 7** in  $\text{DMSO-}d_6$ .



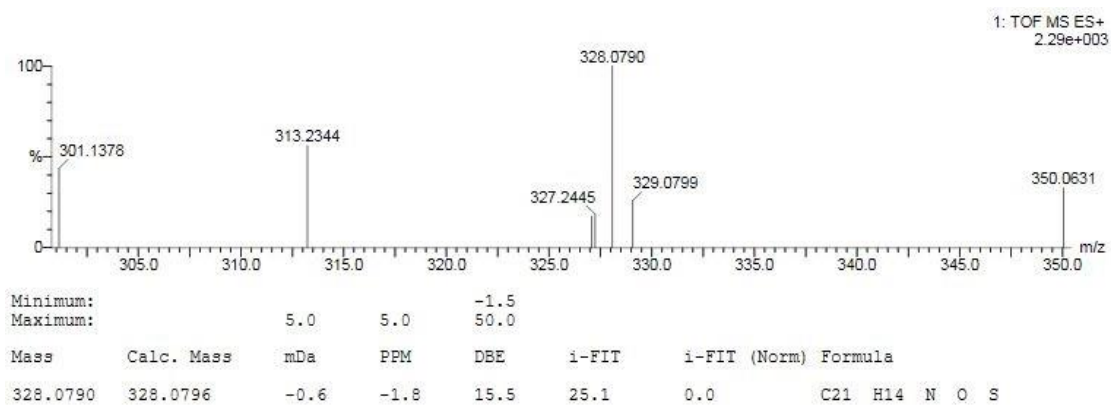

Fig. S30 HRMS spectrum of **compound 7**.

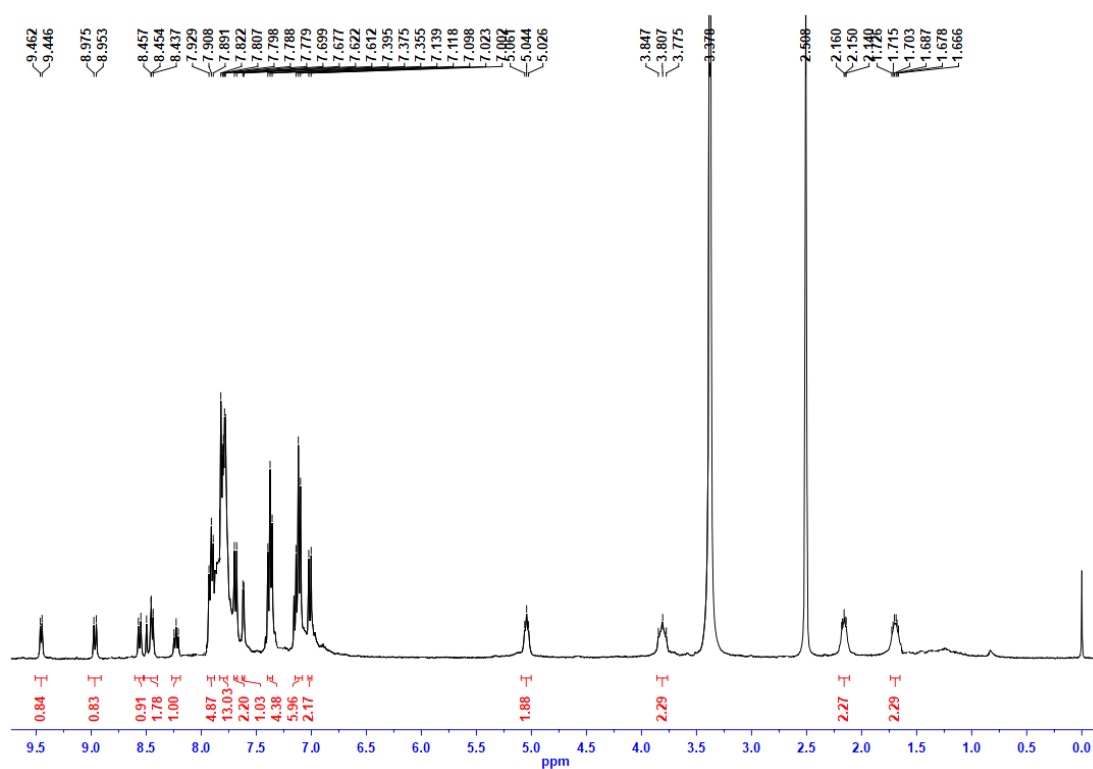

Fig. S31  $^1\text{H}$  NMR spectrum of **LOCK-0** in  $\text{DMSO-}d_6$ .

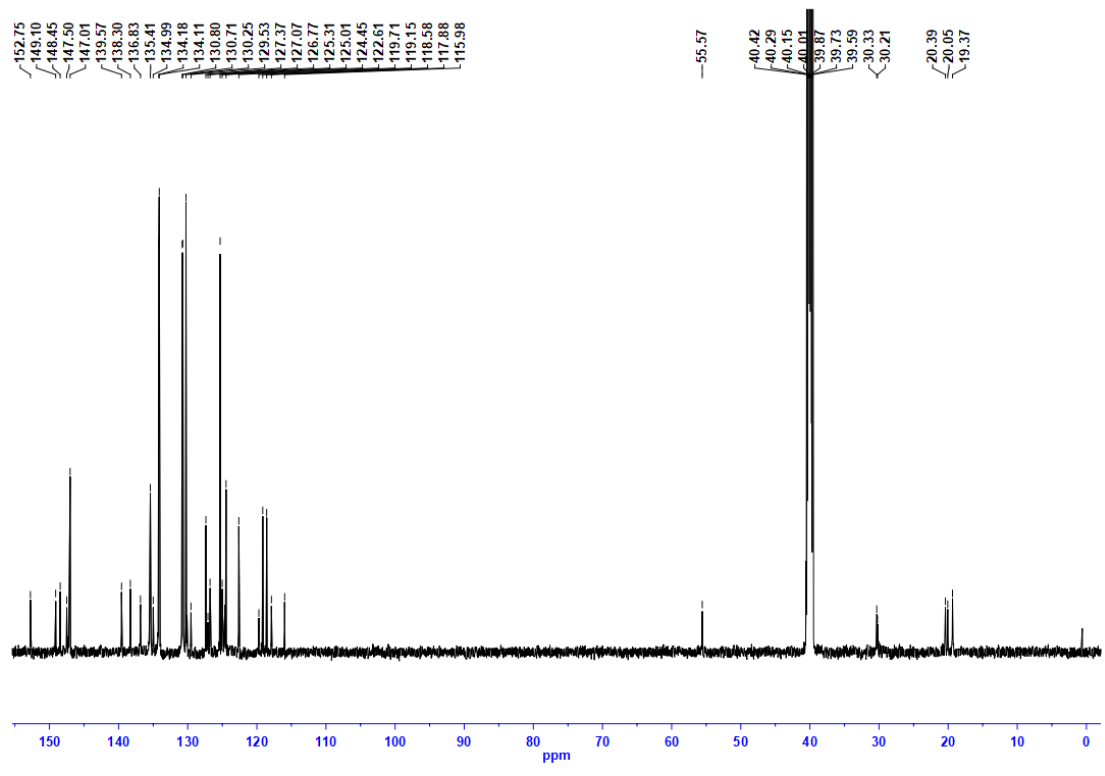

Fig. S32  $^{13}\text{C}$  NMR spectrum of LOCK-0 in  $\text{DMSO-}d_6$ .

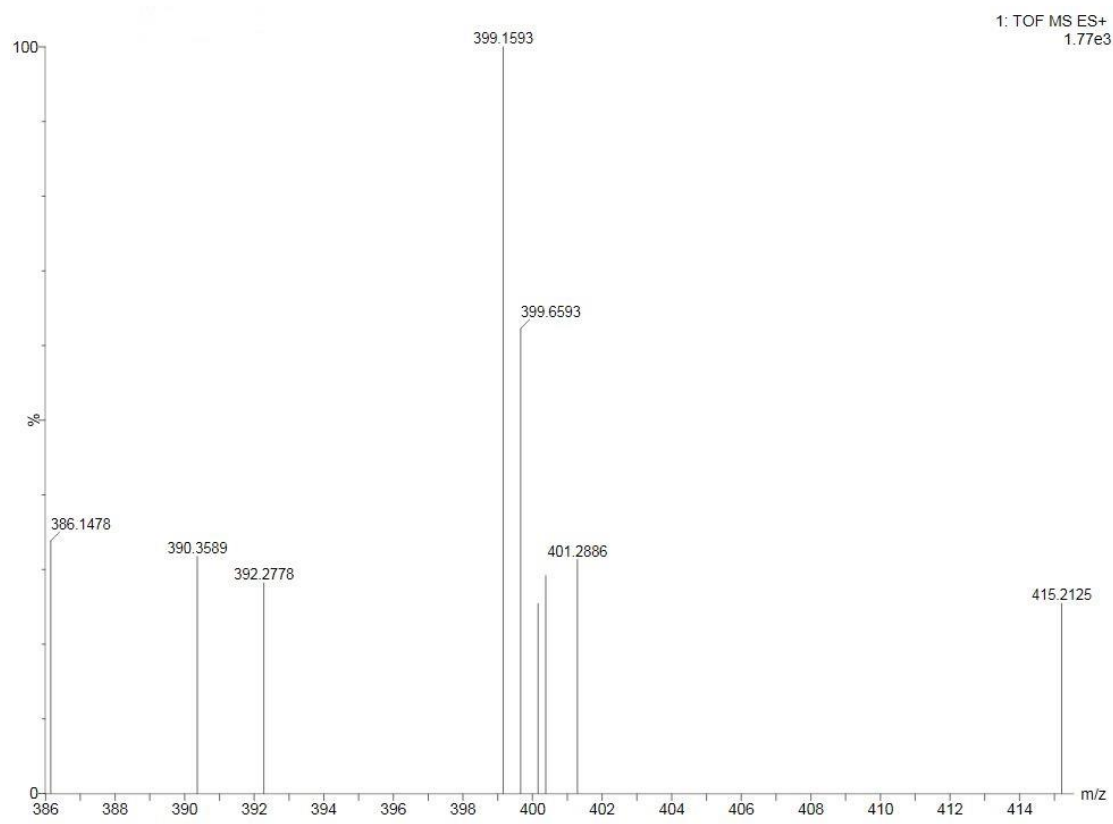

Fig. S33 HRMS spectrum of LOCK-0.

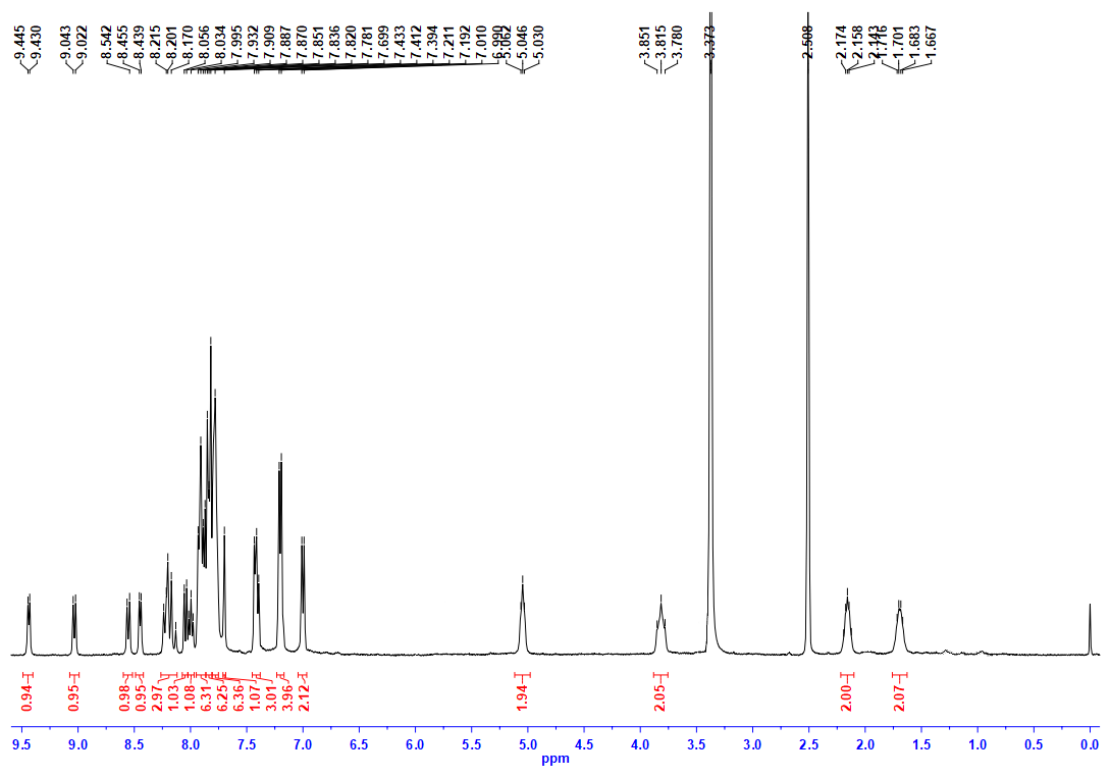

Fig. S34  $^1\text{H}$  NMR spectrum of LOCK-1 in  $\text{DMSO-}d_6$ .

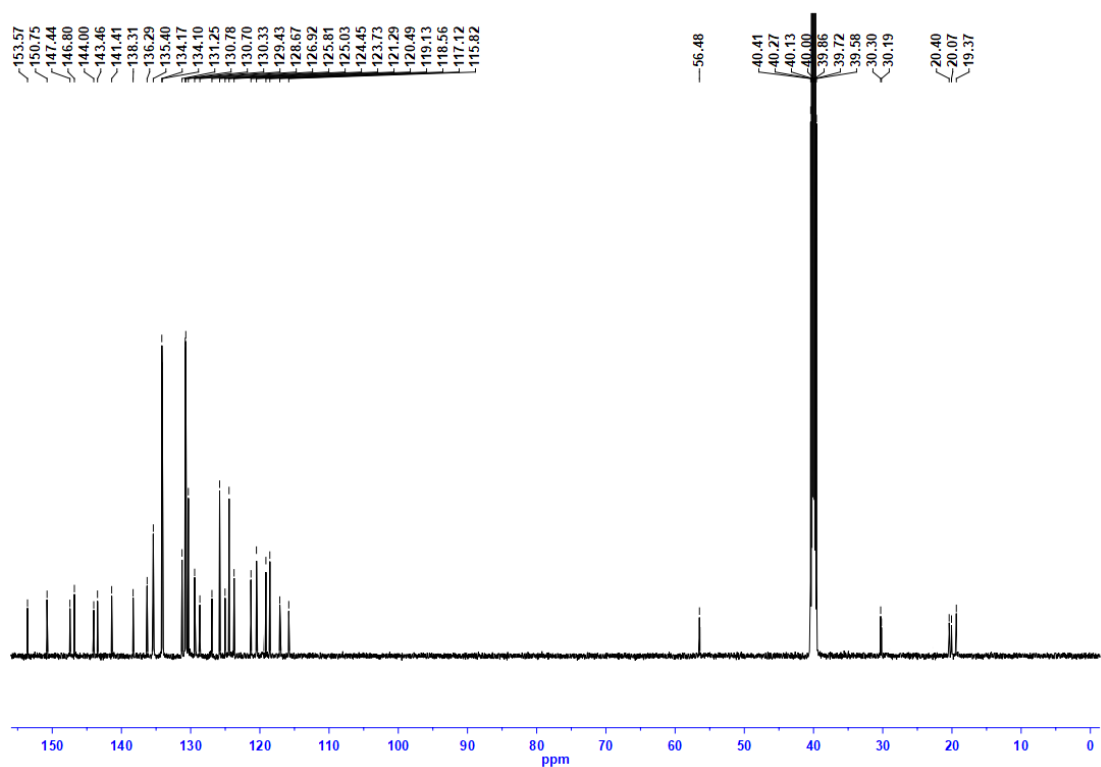

Fig. S35  $^{13}\text{C}$  NMR spectrum of LOCK-1 in  $\text{DMSO-}d_6$ .

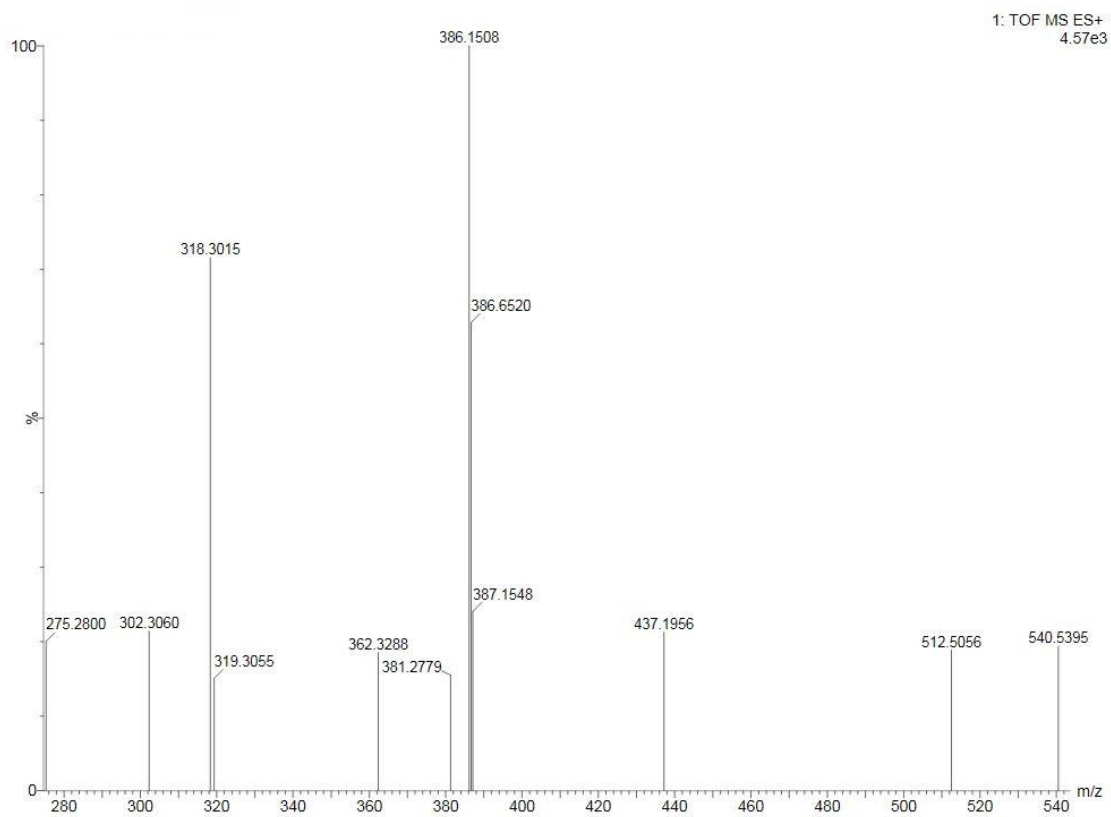

Fig. S36 HRMS spectrum of LOCK-1.

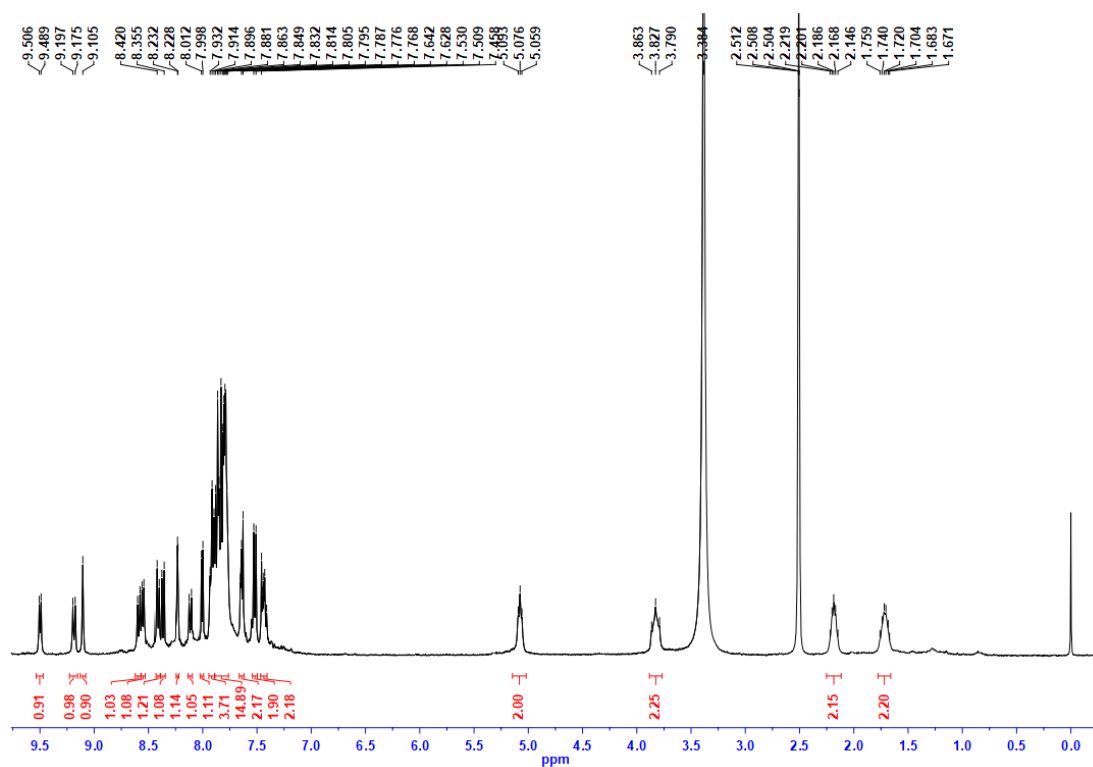

Fig. S37 <sup>1</sup>H NMR spectrum of LOCK-2 in DMSO-*d*<sub>6</sub>.

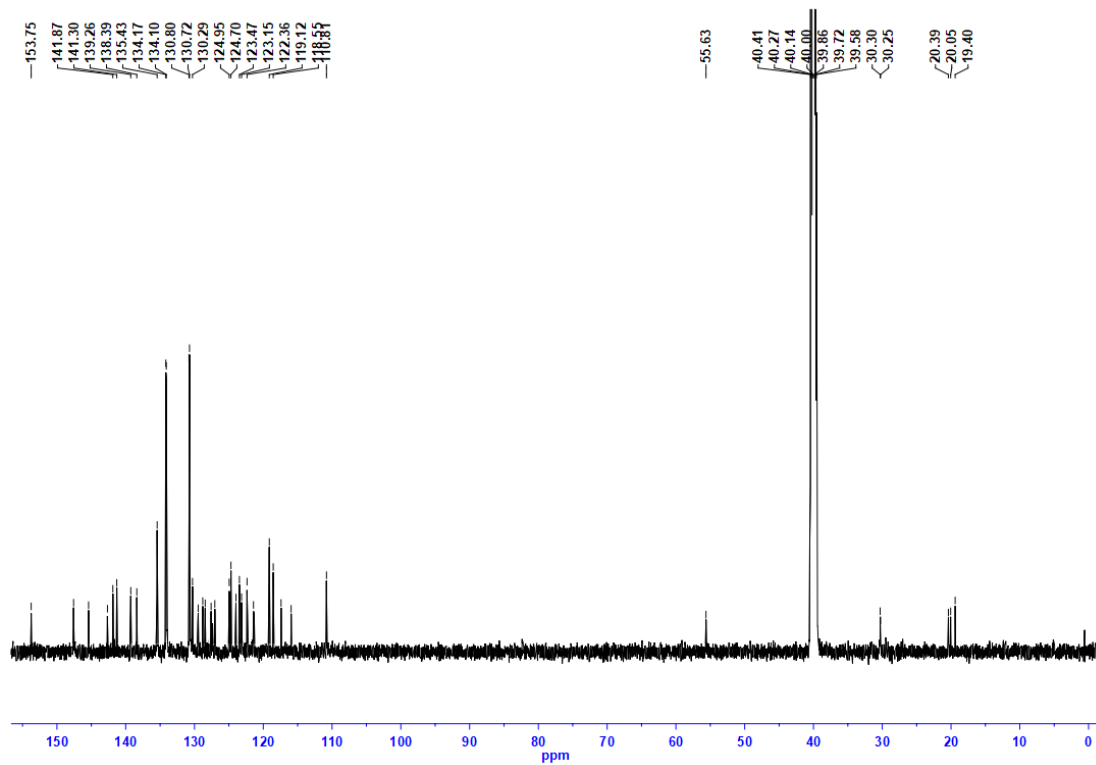

**Fig. S38**  $^{13}\text{C}$  NMR spectrum of **LOCK-2** in  $\text{DMSO-}d_6$ .

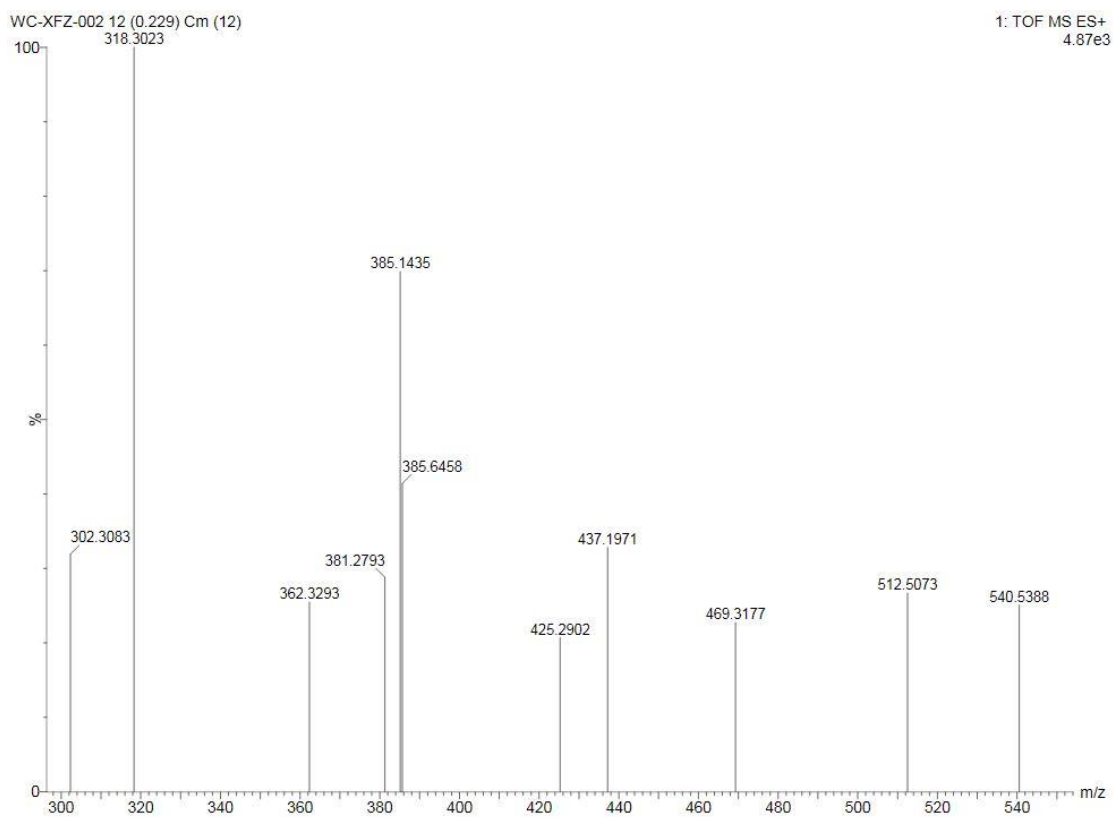

**Fig. S39** HRMS spectrum of **LOCK-2**.

**Table S1** Energy levels and energy gaps of HOMO and LUMO for **LOCK-0**, **LOCK-1** and **LOCK-2**.

|                   | <b>LOCK-0</b> | <b>LOCK-1</b> | <b>LOCK-2</b> |
|-------------------|---------------|---------------|---------------|
| LUMO (eV)         | -2.26         | -2.25         | -2.29         |
| HOMO (eV)         | -6.24         | -6.34         | -6.71         |
| $\Delta E_g$ (eV) | 3.98          | 4.09          | 4.42          |

**Table S2** Electronic excitation energy levels of singlet and triplet states for **LOCK-0**.

| State          | Energy level (eV) | State          | Energy level (eV) | $\Delta E_{S1Tn}$ (eV) |
|----------------|-------------------|----------------|-------------------|------------------------|
| S <sub>1</sub> | 2.2137            | T <sub>1</sub> | 1.0687            | 1.1450                 |
| S <sub>2</sub> | 3.4545            | T <sub>2</sub> | 2.3243            |                        |
| S <sub>3</sub> | 3.9064            | T <sub>3</sub> | 2.9496            |                        |
| S <sub>4</sub> | 4.0416            | T <sub>4</sub> | 3.0448            |                        |
| S <sub>5</sub> | 4.3248            | T <sub>5</sub> | 3.3669            |                        |
| S <sub>6</sub> | 4.3825            | T <sub>6</sub> | 3.4607            |                        |

**Table S3** Electronic excitation energy levels of singlet and triplet states for **LOCK-1**.

| State          | Energy level (eV) | State          | Energy level (eV) | $\Delta E_{S1Tn}$ (eV) |
|----------------|-------------------|----------------|-------------------|------------------------|
| S <sub>1</sub> | 2.3236            | T <sub>1</sub> | 1.1727            | 1.1509                 |
| S <sub>2</sub> | 3.5939            | T <sub>2</sub> | 2.4849            |                        |
| S <sub>3</sub> | 3.7627            | T <sub>3</sub> | 3.0671            |                        |
| S <sub>4</sub> | 4.1404            | T <sub>4</sub> | 3.1305            |                        |
| S <sub>5</sub> | 4.2083            | T <sub>5</sub> | 3.3135            |                        |
| S <sub>6</sub> | 4.4050            | T <sub>6</sub> | 3.3817            |                        |

**Table S4** Electronic excitation energy levels of singlet and triplet states for **LOCK-2**.

| State          | Energy level (eV) | State          | Energy level (eV) | $\Delta E_{S1Tn}$ (eV) |
|----------------|-------------------|----------------|-------------------|------------------------|
| S <sub>1</sub> | 2.7029            | T <sub>1</sub> | 1.4350            | 1.2679                 |
| S <sub>2</sub> | 3.6480            | T <sub>2</sub> | 2.5572            | 0.1457                 |
| S <sub>3</sub> | 3.7773            | T <sub>3</sub> | 3.1027            |                        |
| S <sub>4</sub> | 4.0670            | T <sub>4</sub> | 3.1621            |                        |
| S <sub>5</sub> | 4.1029            | T <sub>5</sub> | 3.2589            |                        |
| S <sub>6</sub> | 4.3748            | T <sub>6</sub> | 3.5185            |                        |

## References

- 1 H. Huang and Y. Tian, *Chem. Commun.*, 2018, **54**, 12198-12201.
- 2 H. E. Okda, S. El Sayed, R. C. M. Ferreira, R. C. R. Gonçalves, S. P. G. Costa, M. M. M. Raposo, R. Martínez-Máñez and F. Sancenón, *New J. Chem.*, 2019, **43**, 7393-7402.
